# Supplementary material for: Cassini in situ observations of long-duration magnetic reconnection in Saturn’s magnetotail
Source: Springer Nature journal article supplement (doi:10.1038/nphys3565), 2015-11-23
Supplement: 41567_2016_BFnphys3565_MOESM7_ESM.pdf [file 41567_2016_BFnphys3565_MOESM7_ESM.pdf]

# Cassini *in situ* observations of long-duration magnetic reconnection in Saturn's magnetotail

4 C.S. Arridge<sup>1</sup>, J.P. Eastwood<sup>2</sup>, C.M. Jackman<sup>3</sup>, G.-K. Poh<sup>4</sup>, J.A. Slavin<sup>4</sup>, M.F.  
5 Thomsen<sup>5</sup>, N. André<sup>6</sup>, X. Jia<sup>4</sup>, A. Kidder<sup>7</sup>, L. Lamy<sup>8</sup>, A. Radioti<sup>9</sup>, N. Sergis<sup>10</sup>, M.  
6 Volwerk<sup>11</sup>, A.P. Walsh<sup>12</sup>, P. Zarka<sup>8</sup>, A.J. Coates<sup>13</sup>, M.K. Dougherty<sup>2</sup>

7 1. Department of Physics, Lancaster University, Bailrigg, Lancaster, LA1 4YB, United Kingdom.

8 2. Department of Physics, Imperial College, South Kensington, London, SW7 2BW, United Kingdom.

9 3. School of Physics and Astronomy, University of Southampton, Southampton, SO17 1BJ, United Kingdom.

10 4. Department of Atmospheric, Oceanic and Space Sciences, University of Michigan, 2455 Hayward St., Ann  
11 Arbor, Michigan 48109-2143, USA

12 5. Planetary Science Institute, 1700 East Fort Lowell, Suite 106, Tucson, Arizona 85719-2395, USA.

13 6. CNRS, Institut de Recherche en Astrophysique et Planétologie, 9 avenue du colonel Roche, BP 44346,  
14 31028 Toulouse Cedex 4, France.

15 7. Department of Earth and Space Sciences, University of Washington, Box 351310, Seattle, Washington  
16 98195, USA.

17 8. LESIA-Observatoire de Paris, CNRS, UPMC Univ. Paris 6, Univ. Paris-Diderot, 92195, Meudon, France.

18 9. Laboratoire de Physique, Atmosphérique et Planétaire, Institut d'Astrophysique et de Géophysique,  
19 Université de Liège, Liège, Belgium.

20 10. Office for Space Research, Academy of Athens, 4, Soranou Efesiou str., 11527, Papagos, Athens,  
21 Greece.

- 22 11. Austrian Academy of Sciences, Space Research Institute, Schmiedlstraße 6, 8  
23 042 Graz, Austria.
- 24 12. Science and Robotic Exploration Directorate, European Space Agency, ESAC, Villanueva de la Cañada,  
25 28692 Madrid, Spain.
- 26 13. Mullard Space Science Laboratory, Department of Space and Climate Physics, University College  
27 London, Holmbury St. Mary, Dorking, Surrey, RH5 6NT, United Kingdom.
- 28

## 29 **Trajectory**

30 Figure S1 shows the trajectory of Cassini in Kronocentric Solar Magnetospheric (KSM)  
31 coordinates, where the X axis points from Saturn to the Sun, the X-Z plane contains the  
32 spin axis of Saturn, and Y points towards dusk. After periapsis with Saturn on 25  
33 September 2006, Cassini started its orbit (Revolution) 30 and moved out into the  
34 magnetotail via dusk reaching an apoapsis of  $36.6 R_S$  on 03 October 2006 at 1904 UT at a  
35 local time of 00h18m and latitude of  $20.9^\circ$  with the spacecraft moving towards the equator.  
36 At the start of the reconnection event at 0146 UT on 08 October 2006 (day of year 281)  
37 the spacecraft was at  $29.0 R_S$ , a latitude of  $9.25^\circ$  and local time 01h27m. The KSM  
38 coordinates at the start of the reconnection event was  $(-26.8, -10.6, -2.63) R_S$ . From figure  
39 S1 we can see that the spacecraft was located slightly north of the warped  
40 magnetospheric current sheet as can also be seen in the observations (figure 1).

## 41 **Instrumentation**

42 Data in this study comes from the magnetometer, plasma spectrometer (CAPS), Radio  
43 and Plasma Wave Science (RPWS), and Magnetospheric Imaging Instrument (MIMI)  
44 instruments on the Cassini spacecraft. Upstream solar wind conditions are obtained from  
45 the ENLIL model<sup>1</sup> and are discussed in more detail in the next section.

46 Magnetometer data are taken from the fluxgate magnetometer instrument at a cadence of  
47 1s in a spherical polar coordinate system centred on the spacecraft (Kronographic Radial-  
48 Theta-Phi, KRTP) which is based on the kronographic position of the spacecraft, where  
49 the radial vector,  $\mathbf{e}_r$ , is oriented from the planet to the spacecraft, the polar vector,  $\mathbf{e}_\theta$ ,  
50 points in the direction of increasing co-latitude, and the azimuthal vector  $\mathbf{e}_\phi$  completes the  
51 right-handed set and is oriented in a prograde direction around Saturn.

52 Plasma data are taken from the CAPS electron spectrometer (ELS) and ion mass  
53 spectrometer (IMS) which are electrostatic analysers but where IMS also has a time-of-  
54 flight (TOF) section to determine the energy-resolved mass per charge ratio of the  
55 incoming ions with a mass/charge resolution of 12.5%. ELS detects electrons between 0.6  
56 and 28750 eV/e in 63 energy bins with a resolution of  $\Delta E/E$  of 16.7%. The instantaneous  
57 field-of-view (FOV) is split into eight  $20^\circ \times 5.2^\circ$  anodes providing a total  $160^\circ \times 5.2^\circ$   
58 instantaneous FOV. ELS sweeps this FOV every 2 s but these samples can be averaged  
59 on board to lower time and energy resolution. IMS detects positive ions between 1 and  
60 50280 eV/q in 63 energy bins with a resolution of  $\Delta E/E$  of 16.7% and a cadence of 4 s.  
61 Similar to ELS, the instantaneous FOV is split into eight anodes each with an FOV of  
62  $20^\circ \times 8.3^\circ$  providing a total instantaneous FOV of  $160^\circ \times 5.3^\circ$ . The FOV of ELS and IMS are  
63 approximately boresighted. To improve the FOV the whole CAPS instrument is mounted  
64 on a rotating platform which sweeps the sky by around  $1^\circ/\text{s}$ , extending the FOV to  $\sim 2\pi$  sr  
65 with a period of  $\sim 3$  minutes. The spacecraft was also rolling for part of the interval reported  
66 in this paper which improves the total field-of-view to almost  $4\pi$  sr but complicates the  
67 analysis as described in the appropriate sections below.

68 Radio data is provided by the RPWS instrument which includes three nearly orthogonal  
69 electric field antennae to detect AC electric fields between 1 Hz and 16 MHz and are  
70 particularly processed in this paper to analyse kilometric radio emissions<sup>2</sup>.

## 71 **Solar wind simulations and Cassini remote sensing**

### 72 **observations**

73 Since there is no upstream monitor at Saturn models must be used to understand the  
74 upstream solar wind and interplanetary magnetic field (IMF) conditions while the  
75 spacecraft is inside the magnetosphere, as it was during this event. The MSWiM model is

76 a 1.5-d MHD propagation of solar wind conditions measured at 1 AU but is only usable  
77 near apparent opposition which occurred on 25 February 2006. During the October 2006  
78 time period Saturn is far from apparent opposition and so this model is not reliable. ENLIL  
79 is a 3D MHD simulation of the heliosphere<sup>1</sup> which is available at the Community  
80 Coordinated Modeling Center (CCMC) at NASA Goddard Space Flight Center. This model  
81 is not hampered by the same opposition viewing effects as MSWiM. The model inner  
82 boundary condition is provided by coronal models, driven by observed magnetograms,  
83 and is placed at 21.5 or 30 solar radii depending on the coronal model. Although limited  
84 validation studies of ENLIL have been performed for the outer heliosphere near Saturn,  
85 uncertainties on the arrival times for stream interaction regions can be up to four days at 5  
86 AU, from a comparison of ENLIL results with Ulysses data<sup>3</sup>. In this work, version 2.7 of  
87 ENLIL was run with an inner boundary condition provided by the Wang-Sheely-Arge model  
88 for Carrington rotation 2048 and provided solar wind simulation results at Saturn's position  
89 from 21 September to 24 October 2006. In order to properly compare the in situ Cassini  
90 data with the ENLIL results we use Cassini observations of auroral radio emissions  
91 (Saturn Kilometric Radiation, SKR), known to brighten in response to solar wind  
92 compression<sup>4,5</sup>. These observations are used to identify a time shift that can be applied to  
93 the ENLIL results.

94 Figure S2 contains a summary of Cassini radio and plasma wave observations and ENLIL  
95 solar wind simulations for the period covering the event. The unshifted ENLIL data is  
96 shown in blue and the shifted data (discussed below) is in black. The interval  
97 encompasses a corotating interaction region (CIR) where the pressure and magnetic field  
98 strength increase. Four crossings of the heliospheric current sheet (HCS) are identified  
99 from reversals in the  $B_T$  component of the magnetic field in Radial-Tangential-Normal  
100 (RTN) coordinates. Such crossings are typically embedded within CIR compressions at

101 Saturn. The presence of a forward shock (FS) from an increase in the solar wind speed  
102 and a coincident increase in the dynamic pressure is also identified.

103 Turning to the Cassini Radio and Plasma Wave (RPWS) data in figures S2a and S2b: prior  
104 to the event on 08 October the flux density displays periodic increases in flux as commonly  
105 found in Saturn's magnetosphere<sup>2</sup> and has a right-hand circular polarisation consistent  
106 with extraordinary mode emission from the northern hemisphere, as expected from  
107 Cassini's northern latitude (figure S2c). These periodic emissions are found to occur at the  
108 expected phase for northern SKR emissions, labelled N at the top of figure S2a (6).

109 The white arrows in figure S2a identify example enhancements in SKR flux density with  
110 associated low frequency extensions (LFE) and a right-hand circular polarisation (northern  
111 hemisphere emission), for example, at 0800 UT on 29 September, 1200 UT on 05 October  
112 and 2000 UT on 06 October. These occur at, or near, the expected phase for northern  
113 hemisphere emissions and are characteristic of internally-triggered SKR enhancements  
114 that are controlled by magnetospheric rotational modulation<sup>7</sup>. The physical significance of  
115 these LFEs has been linked to increased precipitation of particles into the auroral zone  
116 and growth/movement of the radio source to higher altitudes (and hence lower frequencies  
117 since the emission frequency is inversely proportional to magnetic field strength).

118 Following these LFEs there are two long-lasting enhancements in SKR power on 08  
119 October for 15 hours and 11 October for 24 hours, more characteristic of external solar  
120 wind control<sup>4</sup>. During these periods SKR is a very strong emission that lasts for more than  
121 one Saturn rotation, and does not have any correlation with northern or southern SKR  
122 phase<sup>6</sup>. The low frequency range (<10 kHz) displays intense SKR. The disappearance of  
123 SKR emissions around 2300 UT on 12 October is due to the spacecraft reaching Saturn  
124 periapsis (e.g., Figure S3) where SKR is not visible. The detached nature of the low

125 frequency SKR emissions may be produced by a spatially separated (in longitude or  
126 latitude) source region with different regions producing the high- and low-frequency  
127 emissions. The direction-finding capabilities of the RPWS instrument allow us to  
128 investigate if the source region was spatially separated but unfortunately the spatial  
129 resolution of the analysis was not sufficient due to the distance of Cassini from Saturn. A  
130 more likely interpretation is that the gap is due to refractive effects from the propagation of  
131 the emissions through the complex plasma environment of Saturn's inner magnetosphere.  
132 Similar refractive effects are observed at Earth as auroral kilometric radiation propagates  
133 through Earth's plasmasphere. This interpretation is supported by the abrupt change in  
134 SKR polarisation near 70-80 kHz which is difficult to incorporate in a description involving  
135 spatially separated sources.

136 The first event originates from the northern hemisphere (right-hand circular polarisation)  
137 and the second from the southern hemisphere (left-hand circular polarisation). If these  
138 were the same event, but viewed from the northern, then the southern hemisphere, we  
139 might expect to see a change in polarisation at the equator. However, the northern  
140 hemisphere emission fades well before the spacecraft crosses the equator, and at a point  
141 where the latitude and local time are varying slowly. Furthermore, the near-equatorial  
142 spacecraft location during these two events implies that the emissions are not fading due  
143 to the spacecraft passing into a region where they are no longer visible<sup>2</sup>. Hence, this is  
144 evidence for two periods of long-lasting SKR enhancement that are driven separately by  
145 external large-scale compressions of the magnetosphere. Therefore we associate these  
146 two periods of strong SKR emissions with external compressions of the magnetosphere.  
147 We shifted the ENLIL time-series by 5.3 days such that the first major SKR enhancement  
148 begins at the arrival of the first large pressure pulse in the ENLIL time-series. This was  
149 done by matching the rise in dynamic pressure with the rise in intensity of SKR emissions.

150 Given the ~10 hour lag between the arrival of a solar wind dynamic pressure front and the  
151 increase in SKR emissions<sup>5</sup> we assign an uncertainty of 0.5 days to this estimate (4.8-5.3  
152 days). In doing this, the second strong enhancement in SKR flux density matches the  
153 second pressure pulse in the ENLIL results thus providing supporting evidence that these  
154 enhancements in SKR are associated with externally-driven magnetospheric  
155 compressions. We also note that the increase in solar wind dynamic pressure occurs at  
156 the forward shock (FS) and occurs approximately at the same time as the onset of the  
157 periodic LFEs and the onset of this activity might represent the arrival of the CIR at Saturn.

158 Finally, the low frequency SKR emissions are accompanied by rising periodic narrow band  
159 emissions, mainly with opposite polarisation. These appear at frequencies around 5 kHz,  
160 so-called Saturnian Myriametric Radiation or n-SMR (8) and around 20 kHz, identified as  
161 narrowband SKR or n-SKR<sup>2</sup>. n-SMR are similar to continuum emissions from Earth's  
162 plasmopause, and n-KOM emissions from the Io torus, which are known to be generated  
163 at density gradients<sup>8</sup>. These might be attributed to dynamics internal to the plasma disc but  
164 in this case there is evidence that they are triggered by increases in the solar wind  
165 dynamic pressure. Although the spacecraft is moving latitudinally, there is no correlation of  
166 the morphology of the emissions with the location of the spacecraft, and the emissions  
167 appear after the major magnetospheric compressions (figure S2g). Activity in n-SKR and  
168 n-SMR continues however until 17 October, which is a much longer period than the 4 – 5  
169 days previously reported<sup>8</sup> and may reflect the strength of the external compression, or that  
170 the initial external trigger has resulted in a “cascade” of internally-driven responses.

171 In summary, shifting the ENLIL time series by 4.8-5.3 days (to form the shifted time series  
172 in figure S2) we arrive at the following sequence of upstream events. Between 0000 UT  
173 and 1200 UT on 06 October a forward shock impacted Saturn and over the course of ~12  
174 hours the magnetosphere was slowly compressed from a subsolar magnetopause position



175 of 25  $R_S$  to 17  $R_S$  representing a moderate compression due to the enhanced  
176 compressibility of Saturn's magnetosphere compared to Earth<sup>9</sup>. A pressure pulse with a  
177 peak dynamic pressure of 0.23 nPa arrives between 1200 UT on 07 October and 0000 UT  
178 on 08 October compressing the magnetosphere over the next ~6 hours such that the  
179 magnetopause subsolar distance decreases to  $14 \pm 2 R_S$ , representing an extreme and  
180 relatively rare compression. The pressure pulse begins to fade around 16 hours after it  
181 arrived falling back to a magnetopause subsolar distance of  $\sim 20 R_S$  by the end of 08  
182 October. Between the middle of the day on 09 October and early on 10 October a smaller  
183 pressure pulse arrives producing a magnetopause standoff distance of  $16 \pm 2 R_S$ .

## 184 **Rotation of the magnetic field data to remove the effect of** 185 **sweepback**

186 The magnetic field at Saturn is swept-back into a lagging configuration over most local  
187 times produced by a combination of magnetopause currents and outward transport of  
188 internally produced plasma<sup>10</sup>, although the latter is thought to dominate the observed  
189 sweep-back. The effect of this sweep-back is to introduce an azimuthal component to the  
190 magnetic field (in spherical polar coordinates) which reverses in sense about the centre of  
191 the current sheet such that the azimuthal and radial components of the field have an anti-  
192 phase relationship. Typically,  $B_r > 0$  and  $B_\phi < 0$  above the current sheet, and  $B_r < 0$  and  $B_\phi > 0$   
193 below the current sheet. In collisionless reconnection, separation of ions and electrons  
194 occurs as the ions demagnetise in the ion diffusion region but where the electrons remain  
195 frozen to the field and continue to inflow towards the X-line where they eventually  
196 demagnetise at the electron scale. This separation of ions and electrons produces a  
197 current system known as the Hall current and associated field (the Hall magnetic field)<sup>11</sup>.  
198 There is also a Hall electric field associated with this structure, but in this article we will

199 refer to the Hall magnetic field as simply the Hall field. The Hall field has a quadrupolar  
 200 structure with out-of-plane components.

201 Figure S4 illustrates the relationship between the Hall field and the azimuthal field  
 202 associated with sweep-back and highlights the fact that the presence of the Hall field may  
 203 be masked by the swept-back configuration of the field. For example, on the tailward side  
 204 of the X-line the Hall field has a positive out-of-plane component above the current sheet  
 205 but the swept-back configuration also produces a positive out-of-plane component. Hence,  
 206 in the KRTP coordinate system it is hard to detect the presence of the Hall field. To clearly  
 207 identify the Hall field we rotate the magnetic field data into an X-line coordinate system  
 208 using the sweep-back angle of the field, defined as  $\alpha = \tan^{-1}(B_\phi/B_r)$ :

$$209 \begin{pmatrix} B_x \\ B_y \\ B_z \end{pmatrix} = \begin{pmatrix} \cos \alpha & 0 & \sin \alpha \\ -\sin \alpha & 0 & \cos \alpha \\ 0 & -1 & 0 \end{pmatrix} \begin{pmatrix} B_r \\ B_\theta \\ B_\phi \end{pmatrix} \quad 1$$

210  
 211 This produces an X-line coordinate system where X points approximately tailward, Z points  
 212 approximately northward, and Y completes the right-handed set pointing approximately  
 213 dawnward. In the X-line frame the Hall field has components  $B_H(x,z)$  in the y direction  
 214 which when rotated by the sweep-back angle has components  
 215  $(B_{Hr}, B_{H\theta}, B_{H\phi}) = (-B_H \sin \alpha, 0, B_H \cos \alpha)$ . Hence, adding the fields due to azimuthal and  
 216 radial currents we find,  $\mathbf{B}(B_r, B_\theta, B_\phi) = \left\{ B_{r0} \tanh \frac{-z}{D} - B_H \sin \alpha, B_{\theta0}, B_{\phi0} \tanh \frac{-z}{D} + B_H \cos \alpha \right\}$   
 217 where we have simply modelled the radial and azimuthal currents with Harris current  
 218 sheets. Applying this to our transformation (eq. 1) we obtain:

$$219 \quad \begin{pmatrix} B_x \\ B_y \\ B_z \end{pmatrix} = \begin{pmatrix} \cos \alpha & 0 & \sin \alpha \\ -\sin \alpha & 0 & \cos \alpha \\ 0 & -1 & 0 \end{pmatrix} \begin{pmatrix} B_{r0} \tanh \frac{-z}{D} - B_H \sin \alpha \\ B_{\theta 0} \\ B_{\phi 0} \tanh \frac{-z}{D} + B_H \cos \alpha \end{pmatrix} \quad 2$$

$$220 \quad \begin{pmatrix} B_x \\ B_y \\ B_z \end{pmatrix} = \begin{pmatrix} B_{r0} \tanh \frac{-z}{D} \cos \alpha - B_H \sin \alpha \cos \alpha + B_{\phi 0} \tanh \frac{-z}{D} \sin \alpha + B_H \sin \alpha \cos \alpha \\ -B_{r0} \tanh \frac{-z}{D} \sin \alpha + B_H \sin \alpha \sin \alpha + B_{\phi 0} \tanh \frac{-z}{D} \cos \alpha + B_H \cos \alpha \cos \alpha \\ -B_{\theta 0} \end{pmatrix} \quad 3$$

221 which simplifies to:

$$222 \quad \begin{pmatrix} B_x \\ B_y \\ B_z \end{pmatrix} = \begin{pmatrix} B_{r0} \tanh \frac{-z}{D} \cos \alpha + B_{\phi 0} \tanh \frac{-z}{D} \sin \alpha \\ -B_{r0} \tanh \frac{-z}{D} \sin \alpha + B_{\phi 0} \tanh \frac{-z}{D} \cos \alpha + B_H \\ -B_{\theta 0} \end{pmatrix} \quad 4$$

223 Finally, we note that  $\alpha = \tan^{-1}(B_{\phi 0}/B_r)$  and hence  $B_{r0} \tanh(-z/D) \sin(\alpha) = B_{\phi 0} \tanh(-z/D) \cos(\alpha)$

224 so

$$225 \quad \begin{pmatrix} B_x \\ B_y \\ B_z \end{pmatrix} = \begin{pmatrix} B_{r0} \tanh \frac{-z}{D} \cos \alpha + B_{\phi 0} \tanh \frac{-z}{D} \sin \alpha \\ B_H \\ -B_{\theta 0} \end{pmatrix} \quad 5$$

226 Hence, the Hall field is obtained from the  $B_y$  component of the X-line coordinate system.

227 The sweep-back angle was measured from the magnetometer data between 08 Oct 2006

228 0000 UT and 0100 UT and found to be equal to  $-25.87^\circ \pm 4.87^\circ$  and so a value of  $-26^\circ$  was

229 adopted in this study.

## 230 Electron pitch angle distributions near the X-line

231 Figure S5 shows reconstructed pitch angle distributions (PAD) in each quadrant of the X-

232 line. CAPS/ELS has an instantaneous FOV of  $160^\circ \times 5.2^\circ$  which is increased to  $\sim 160^\circ \times 200^\circ$

233 by a mechanical scanning platform. Each PAD is produced by combining fluxes measured

234 over a single mechanical  $\sim 3$  minute scan (actuation). Within this period ELS captures

235 spectra at a cadence between 2 and 32 s but for this study the maximum sampling time  
236 was restricted to 8s to avoid undetectable aliasing of the PAD. These fluxes were  
237 background-subtracted and sorted into  $10^\circ$  wide pitch angle bins and shifted by the  
238 (positive) spacecraft potential to remove trapped spacecraft photoelectrons. The raw  
239 spectrograms and reconstructed PADs were checked for evidence of aliasing.

240 In general the PAD is incomplete due to the limited field of view of the instrument.  
241 However, four typical PADs were identified in each quadrant of the X-line. Electron PADs  
242 in ion diffusion regions in Earth's magnetotail were found to consist of cool  $\sim 100$  eV  
243 electrons flowing towards the X-line carrying the Hall current, and hotter  $>1$  keV electrons  
244 flowing away from the X-line associated with acceleration near the X-line<sup>12</sup>. In Figure S5  
245 we can see that due to the restricted field of view, the orientation of the spacecraft, and  
246 changes in orientation of the magnetic field, only electrons flowing out of the X-line are  
247 visible on the tailward side of the X-line, and electrons flowing towards the X-line are  
248 visible on the planetward side of the X-line. The samples in figure S5 were captured at  
249 0242 UT (above the current sheet and tailward), 0341 UT (below and tailward), 0431 UT  
250 (below and planetward). We can see that the electrons flowing into the X-line are relatively  
251 cool with a peak energy near  $\sim 400$  eV. The electrons flowing out of the X-line are hot  
252 about  $\sim 2$  keV above the current sheet earlier in the interval at 0242 UT, and  $\sim >10$  keV  
253 below the current sheet later at 0341 UT. These are entirely consistent with hot electrons  
254 flowing out of the X-line and cooler electrons flow in towards the X-line and carrying the  
255 Hall current, similar to terrestrial observations<sup>12</sup>.

## 256 **Ion flows before and during the ion diffusion region encounter**

257 Ion flows throughout the interval are difficult to analyse due to a combination of spacecraft  
258 rolls, limited viewing, low signal to noise and aliasing of the distributions. Figure S6 shows

259 a time-energy spectrogram of ion fluxes measured by CAPS/IMS, with the electron fluxes  
260 and magnetic field for reference. In this figure ion fluxes have been summed over a 32s  
261 internal duty cycle of the instrument (an A-cycle) to improve the signal-to-noise and  
262 visibility of ion beams as the instrument actuates across the sky – thus relatively narrow  
263 ion beams appear as sharp gradients in the time-energy spectrogram. The “pulsing” in the  
264 background is correlated with the actuating motion of CAPS and is thought to be produced  
265 by a combination of CAPS actuating through a spatially asymmetrical background  
266 produced by radiation from Cassini’s radioisotope thermoelectric generators, and changes  
267 in the shielding of CAPS from this radiation as it actuates relative to the spacecraft  
268 platform and other instruments.

269 In figure S6 the ion fluxes for particular time intervals are presented as a function of look  
270 direction around the spacecraft in order to identify the flow direction of the ions. They also  
271 enable us to identify what directions about the spacecraft are not visible to the CAPS  
272 detector. These are presented in OAS coordinates in a polar projection. The OAS  
273 coordinate system is a spacecraft-centred frame where  $\mathbf{S}$  is a vector from the spacecraft to  
274 the planet,  $\mathbf{O}$  is a vector which is obtained from  $\mathbf{S} \times (\boldsymbol{\Omega} \times \mathbf{S})$  and  $\mathbf{A}$  is a vector along  $\mathbf{S} \times \mathbf{O}$  and  
275 completes the right-handed set. The panels in figure S7 are presented in polar coordinates  
276 where the polar angle  $\theta_{\text{OAS}}$  is the angle between a look vector and  $\mathbf{S}$  such that  $\theta_{\text{OAS}}=0^\circ$   
277 represents a direction towards Saturn from Cassini, whereas  $90^\circ$  is perpendicular to the  
278 Cassini-Saturn line. The azimuthal angle  $\phi_{\text{OAS}}$  is an angle around the  $\mathbf{S}$ . Thus, each panel  
279 in figure S7 is drawn from the perspective of an observer on the spacecraft. The centre of  
280 the panel is looking at Saturn ( $\theta_{\text{OAS}}=0^\circ$ ), the inner circle is  $\theta_{\text{OAS}}=90^\circ$  and the outer circle  
281  $\theta_{\text{OAS}}=180^\circ$ . Hence, ion fluxes in the inner circle are coming from “in front” of the spacecraft,  
282 and between the outer and inner circles come from “behind” the spacecraft. Fluxes from  
283 the left-hand side of the panel have a component of the flow in a prograde (corotational)

284 direction, and from the right-hand side have a component of the flow in an anti-corotational  
285 direction. Fluxes in the upper (lower) half of the panel are coming from above (below) and  
286 thus have a flow component directed downwards (upwards). The pink circle indicates the  
287 direction of the Sun and the pink square shows the direction of corotation.

288 The ion fluxes in S6 show significant fluxes from 2000 UT on 07 October to 0020 UT on 08  
289 October with a decrease in flux from 2245 to 2330 UT which is correlated with a drop in  
290 the electron flux and an increase in the magnitudes of the  $B_r$  and  $B_\phi$  components of the  
291 magnetic field and the magnetic field strength. Throughout this period the field of view of  
292 IMS covers close to the corotation direction and so this drop in flux is consistent with the  
293 motion of the spacecraft into the near-lobe – although a rotation of the flow to a more  
294 azimuthal direction and/or a narrowing of the ion beam (faster flows and/or colder ions)  
295 cannot be ruled out. Figure S7a shows the ion flow directions from 20:08:18 to 20:11:45  
296 on 07 October and although CAPS does not fully capture the corotation direction, the flows  
297 are generally corotational. The ion distributions show clear evidence of two energy peaks,  
298 centred on  $\sim 300$  eV/e and  $\sim 4000$  eV/q, associated with  $H^+$  and  $W^+$  respectively, where the  
299 ratio in counts  $W^+/H^+ = 0.72 \pm 0.06$  from a fit to CAPS/IMS time-of-flight data.

300 From 0242 to 0251 UT energetic ion fluxes are observed, coincident with Cassini entering  
301 the northern part of the plasma sheet from the near lobe-regions. Figures S7b-S7d show  
302 the directions of these fluxes. Although the fluxes are very weak, close to the signal-to-  
303 noise threshold of IMS, the flow direction can be determined. At 0242-0245 (S7b) the ions  
304 are flowing in a tailward and slightly anti-corotational direction, then appear to be flowing  
305 tailward and slightly northward (S7c/S7d). The weakening in the fluxes in S7d is caused by  
306 the ions increasing to higher energies (as can be seen in figure S6). Generally, the typical  
307 ion energy is above  $\sim 2$  keV/q and extends to the upper energy/charge range of the  
308 instrument. From the time-energy spectra there is some evidence in the beam in S7c for

309 two ion peaks, one at  $\sim 8$  keV/q and another at  $\sim 20$  keV/q. From an analysis of the time-of-  
310 flight data, the 8 keV/q beam is associated with  $H^+$  and the 20 keV/q beam with a species  
311 with mass/charge 2 (either  $He^{++}$  or  $H_2^+$ ). An 8 keV/q  $H^+$  ion has a flow speed of  $1200 \text{ km s}^{-1}$ .  
312 This is probably an upper limit to the speed due to the peak energy being due to a  
313 combination of bulk and thermal kinetic energy. The ratio of the mass/charge=2 counts to  
314  $H^+$  is  $7 \pm 1$ . There are no  $W^+$  ions to within the error of the analysis, although a  $W^+$  ion  
315 moving at  $1200 \text{ km s}^{-1}$  has an energy/charge of 130 keV/q, well above the range of the  
316 CAPS/IMS sensor. The energetic ion detectors on Cassini are not orientated in a  
317 favourable direction to observe these ions at this time.

318 The energy spectrum associated with S7d is found about 10 keV/q, which corresponds to  
319 a speed of  $\leq 1400 \text{ km s}^{-1}$ . Over the period in the region tailward of the X-line (0146-0355)  
320 the CAPS FOV is close to corotation (within  $\sim 10\text{-}20^\circ$ ) but no measurable fluxes are found  
321 in that direction.

322 From 0354 to 0825 UT the spacecraft undergoes continuous rolling, with another small roll  
323 from 0940 to 1000 UT. Due to this rolling behaviour IMS scans rapidly across the sky and  
324 it is very difficult to determine the flow directions of the ions. Very narrow features are  
325 found in anodes 6/7 at 0401 UT and anodes 1/2 at 0410 UT but these are not visible in  
326 OAS plots. This large-scale flow feature is consistent with the planetward-looking FOV and  
327 expected planetward reconnection exhaust jets. Evidence for corotational, but slightly  
328 tailwards flow is found from 0445 UT onwards, but only sporadic samples (S7e and S7f)  
329 are available due to the spacecraft roll. After 0500 UT the spacecraft samples the  
330 corotation direction very infrequently, but very low ion fluxes are expected due to the low  
331 plasma density, as indicated by the electron measurements<sup>13</sup>.

332 Hence, these observations show that in the tailward region of the diffusion region (as  
333 determined from the magnetometer data) CAPS observes a  $\sim 1200 \text{ km s}^{-1}$  ion beam  
334 flowing tailward, as expected. By plotting the peaks in ion flux with the look direction  
335 information we can determine the flow directions in KSM coordinates and we find the  
336 following unit vectors for the three ion beams in figures S7b-S7d:  $(-0.95, -0.18, -0.27)$ ,  $(-$   
337  $0.77, 0.57, -0.30)$ , and  $(-0.96, -0.077, -0.28)$  hence showing an ion beam directed tailward.

## 338 Flux ropes and secondary islands

339 Plasmoids, with a loop-like or fluxrope structure, are a common signature in planetary  
340 magnetotails<sup>14,15</sup> and can be found either travelling planetward or tailward. They can also  
341 be seen adjacent to an X-line as a “secondary island” produced as a result of instabilities  
342 that set in once reconnection has commenced<sup>16</sup>, often in the presence of a significant  
343 guide field (perpendicular to the plane of the X-line). The signature of a plasmoid passing  
344 over the spacecraft is a bipolar feature in  $B_z$  with deflection in the  $B_x$  component in the X-  
345 line coordinate system.

346 The  $B_z$  component only changes sign if the spacecraft encounters both the leading and  
347 trailing hemispheres of the structure, and the  $B_x$  component only changes sign if the  
348 spacecraft encounters both the upper and lower hemispheres of the structure. Therefore,  
349  $B_z$  and  $B_x$  will only have bipolar perturbations with no change in sign if the spacecraft  
350 encounters a single quadrant of the structure. Changes in sign will be introduced to these  
351 perturbations if additional quadrants are sampled. Thus in general we search for bipolar  
352 delta- $B_z$  signatures and where the sense (positive-negative or negative-positive) of the  
353 perturbation can indicate the direction of motion. Signatures can still be detected if the  
354 spacecraft does not encounter the plasmoid but where the plasmoid is detected by the  
355 compression of the surrounding field as the plasmoid passes near the spacecraft. These



356 are known as Travelling Compression Regions. If the plasmoid has an axial field then it is  
357 often termed a flux rope and  $B_y$  will show a maximum closest to the centre of the flux rope  
358 axis.

359 Figure S8 shows two periods in the tailward region of the X-line where loops have been  
360 identified by searching for these perturbations in  $B_z$  and  $B_x$ . For clarity we only show loops  
361 where a negative excursion in  $B_z$  is observed. The heavy vertical lines show the passage  
362 of the loop. No evidence for flux rope-type signatures are found in these data.

363 The presence of loops close to the X-line is indicative of secondary islands. Although  
364 secondary islands can be found adjacent to the X-line in the diffusion region, they can also  
365 survive downstream, but in this scenario they provide a method to remote sense the  
366 diffusion region. At a minimum this then shows evidence for persistent ongoing  
367 reconnection.

## 368 **Reconnection rate and Hall magnetic field strength**

369 The ratio of the Hall magnetic field ( $B_y$ ) to the field upstream of the current sheet ( $B_x$ ) is a  
370 dimensionless estimate of the strength of the Hall field. Estimates of the dimensionless  
371 strength of the Hall field at Mars show peak values ranging between 0.29 and 0.76 but  
372 typically  $\sim 0.5$  (15). These amplitudes were found to be comparable in size to the  
373 dimensionless amplitude of the Hall field at Earth with average values of  $0.39 \pm 0.16$  (17).

374 Similarly the ratio between the normal field ( $B_z$ ) and the main field ( $B_x$ ) is an estimate of the  
375 reconnection rate. For Mars, values ranging between 0.072 and 0.335 with an average of  
376 0.16 and standard deviation of 0.09 have been reported, indicating that reconnection was  
377 in the regime of fast reconnection<sup>17</sup>. These values were slightly higher than at Earth but  
378 were perhaps the result of a bias towards intense events in the Mars data set.

379 Figure S9 shows estimates of the strength of the Hall field,  $|B_y|/\max(|B_x|)$ , and the  
380 reconnection rate  $|B_z|/\max(|B_x|)$  for the diffusion region encounter described in this paper.  
381 The mean value of the Hall field (figure S9e) was  $0.18\pm 0.15$ , although the peak of 0.83 is  
382 much higher, compatible with the upper end of the published range<sup>17,18</sup>. The reconnection  
383 rate (figure S9f) was found to be  $0.13\pm 0.10$  with a peak of 0.66 – hence demonstrating fast  
384 reconnection – and is similar to martian and terrestrial values.

## 385 **Reconnection restart**

386 Sporadically from 0605 UT and onward from 0640 UT on 08 October 2006 there is  
387 evidence that reconnection restarts or that a fresh part of the plasma sheet moves over  
388 the spacecraft and another X-line forms. The spacecraft is located in the southern extreme  
389 of the current sheet (steady  $B_r < 0$ ) and apparently on closed field lines (typically  $B_\theta > 0$ ). The  
390 plasma sheet electrons are hotter than typical<sup>19</sup>, with energies between 300 eV and 1 keV.  
391 Around 0610 UT a tailward moving loop is observed from a positive-negative bipolar  
392 signature in  $\Delta B_\theta$  (Figure 3) suggesting a reconnection X-line has formed planetward of  
393 the spacecraft. Since the  $B_\theta$  perturbation doesn't go negative we interpret this as the  
394 remote detection of the loop and as such this is a Travelling Compression Region. From  
395 0640 to 0700 UT hot electrons are observed with an energy of  $\sim 1 - 10$  keV. At 0710 UT a  
396 dipolarisation front passes the spacecraft as noted by the peak in  $|\mathbf{B}|$  and appearance of  
397 hot  $>1$  keV electrons. Another front passes the spacecraft at  $\sim 0810$  UT. These  
398 dipolarisation front passages are interspersed with intervals in the plasma sheet  
399 suggesting that a section of the plasma sheet tailward of the spacecraft is reconnecting  
400 and Cassini is sporadically immersed in the exhaust from that X-line. After the  
401 dipolarisation front at 0810 UT the spacecraft is immersed in hot electrons that increase in  
402 energy with time. Additional smaller-scale positive-negative bipolar  $B_\theta$  structures are seen

403 in this hot exhaust region suggesting the presence of multiple small-scale dipolarisation  
404 fronts<sup>20</sup>.

405 Figure S10 shows ion and electron time-energy spectrograms during these dipolarisation  
406 fronts. As noted in section 6, from 0354 to 0825 UT the spacecraft is continuously rolling,  
407 with another small roll from 0940 to 1000 UT. Due to this rolling behaviour IMS scans  
408 rapidly across the sky and it is very difficult to determine the flow directions of the ions. No  
409 significant ion fluxes are observed during the passage of the tailward plasmoid at 0640 UT  
410 even though the IMS field-of-view is sufficient to observe tailward flows. During the  
411 dipolarisation front at 0710 UT the field-of-view could have seen inward flows from the  
412 dawn sector but not from the near-corotation direction.

413 Significant fluxes are observed between ~0730 and ~0800 UT. Figure S11 shows ion  
414 fluxes organised in OAS coordinates. Figures S11a and S11b show ion fluxes from the  
415 end of the energetic electron interval after the first dipolarisation front and the entry into  
416 the plasma sheet region around ~0730 UT. Figure S11a shows ion fluxes whilst still in the  
417 energetic electron region. The IMS field-of-view does not fully capture these ions but  
418 assuming IMS captures the edge of the ion beam they appear to be moving inwards and  
419 from the duskward direction. Figure S11b shows the next slice and where flows appear  
420 from the corotation direction. The nominal plasma sheet during this region has ratios of  
421 total counts of various species,  $W^+/H^+=13\pm3$  and  $(m/q=2)/H^+=12\pm1$ , showing a plasma  
422 sheet dominated by heavy ions.

423 No significant ion fluxes are observed between 0800 UT and ~1100 UT, but the IMS  
424 viewing is biased to seeing outflows, hence this is not unexpected since the spacecraft is  
425 embedded in heated plasma on closed field lines and so we might expect inflows. Figure  
426 S12 shows the ion and electron fluxes for the remainder of the dynamical effects on 08

427 October. Ion fluxes as a function of the field-of-view are in figures S11c-S11i. At 1115 UT  
428 (figure S12c) ions  $> \sim 5$  keV/q (speed  $\sim 1000$  km/s for  $H^+$  ions) are observed moving  
429 northward, planetward and dawnward consistent with a location in this energised region on  
430 closed field lines connected to the exhaust from a reconnection site. Shortly after that (at  
431  $\sim 1130$ ) the spacecraft enters the plasma sheet with  $\sim 200$  eV electrons and ions flowing in  
432 the corotation direction (and slightly upward) (figure S12d). The spacecraft re-enters the  
433 hot exhaust region around 1240 UT and no significant ion fluxes are seen until 1332 UT  
434 despite IMS seeing the whole sky due to spacecraft rolls – although the non-detection of  
435 ions might be a combination of flow energies exceeding the energy range of IMS and the  
436 flux of ions being below the sensitivity threshold for IMS<sup>13</sup>. At 1332 UT ions are seen just  
437 at the edge of the field of view of IMS and suggest inward flow possibly with a downward  
438 and dawnward component (figure S11e), again consistent with the location of the  
439 spacecraft in the hot exhaust region. Shortly after at 1336 UT the ion flows are more  
440 corotational but still with an inward component (figure S11f). Between  $\sim 1530$  and 1730 the  
441 spacecraft is located in the southern lobe, and energetic electron boundary layers are  
442 seen near the boundary between the lobe and the plasma sheet. In the boundary layers,  
443 ions are found flowing along the magnetic field with pitch angles of  $0^\circ$  (figures S11g and  
444 S11h) towards the planet. These boundary layers are on closed field lines, as indicated by  
445 the presence of an energetic electron population flowing towards the planet with a pitch  
446 angle of  $0^\circ$ , with a counterstreaming component as far as can be seen in the antiparallel  
447 direction (figure S13). Finally, the interval ends with a return to the plasma sheet and  
448 corotational ion flow (figure S11i).

## 449 **Supplementary Materials References**

450 1. Odstrcil, D. Modeling 3D solar wind structure. *Adv. Space Res.* **32**, 497, 2003.

- 451 2. Lamy, L. *et al.* Saturn kilometric radiation: Average and statistical properties. *J.*  
452 *Geophys. Res.* **113**, A07201, doi:10.1029/2007JA012900, 2008.
- 453 3. Jian, L. K. *et al.* Comparison of Observations at ACE and Ulysses with Enlil Model  
454 Results: Stream Interaction Regions During Carrington Rotations 2016 – 2018. *Solar Phys.*  
455 **273**, 179-203, doi:10.1007/s11207-011-9858-7, 2011.
- 456 4. Kurth, W. S. *et al.* Saturn kilometric radiation intensities during the Saturn auroral  
457 campaign of 2013. *Icarus*, in press, doi:10.1016/j.icarus.2015.01.003.
- 458 5. M. D. Desch & H. O. Rucker The relationship between Saturn kilometric radiation and  
459 the solar wind. *J. Geophys. Res.* **88**, pp. 8999-9006, doi:10.1029/JA088iA11p08999, 1983.
- 460 6. L. Lamy, Variability of southern and northern periodicities of Saturn Kilometric Radiation.  
461 Proc. 7<sup>th</sup> International Workshop on Planetary, Solar and Heliospheric Radio Emissions  
462 (PRE VII), Graz, Austria, September 15-17, 2010, pp. 38-50, 2011.
- 463 7. C. M. Jackman *et al.* On the character and distribution of lower-frequency radio  
464 emissions at Saturn and their relationship to substorm-like events. *J. Geophys. Res.* **114**,  
465 A08211, doi:10.1029/2008JA013997, 2009.
- 466 8. P. Louarn *et al.* Observation of similar radio signatures at Saturn and Jupiter:  
467 Implications for the magnetospheric dynamics. *Geophys. Res. Lett.* **34**, L20113,  
468 doi:10.1029/2007GL030368, 2007.
- 469 9. S. J. Kanani *et al.* A new form of Saturn's magnetopause using a dynamic pressure  
470 balance model, based on in situ, multi-instrument Cassini measurements. *J. Geophys. Res.*  
471 **115**, A06207, doi:10.1029/2009JA014262, 2010.

- 472 10. C. S. Arridge *et al.* Mapping magnetospheric equatorial regions at Saturn from Cassini  
473 prime mission observations. *Space Sci. Rev.* **264**(1-4), pp. 1-83, doi:10.1007/s11214-  
474 011/9850-4, 2011.
- 475 11. Øieroset, M., Phan, T.D., Fujimoto, M., Lin, R.P., Lepping, R.P. In situ detection of  
476 collisionless reconnection in the Earth's magnetotail. *Nature* **412**, pp. 414-417 (2001).
- 477 12. Nagai, T. *et al.* Geotail observations of the Hall current system: Evidence of magnetic  
478 reconnection in the magnetotail. *J. Geophys. Res.* **106**, A11, pp. 25929-25949 (2001).
- 479 13. McAndrews, H.J. *et al.* Plasma in Saturn's nightside magnetosphere and the  
480 implications for global circulation. *Planet. Space Sci.* **57**, pp.1714-1722,  
481 doi:10.1016/j.pss.2009.03.003, 2009.
- 482 14. Eastwood, J. P. *et al.* Evidence for collisionless magnetic reconnection at Mars.  
483 *Geophys. Res. Lett.* **35**, L02106, doi:10.1029/2007GL032289 (2008).
- 484 15. Jackman, C.M. *et al.* Saturn's dynamic magnetotail: A comprehensive magnetic field  
485 and plasma survey of plasmoids and traveling compression regions and their role in global  
486 magnetospheric dynamics. *J. Geophys Res. Space Physics*, **119**, 5465-5495,  
487 doi:10.1002/2013JA019388 (2014).
- 488 16. Drake, F., Swisdak, M., Schoeffler, K.M., Rogers, B.N., Kobayashi, S. Formation of  
489 secondary islands during magnetic reconnection. *Geophys. Res. Lett.* **33**, L13105,  
490 doi:10.1029/2006GL025957, 2006.
- 491 17. Eastwood, J. P., Phan, T. D., Øieroset, M., Shay, M. A.. Average properties of the  
492 magnetic reconnection ion diffusion region in the Earth's magnetotail: The 2001-2005  
493 Cluster observations and comparison with simulations. *J. Geophys. Res.* **115**, A08215,  
494 doi:10.1029/2009JA014962 (2010).

- 495 18. Halekas, J. S. *et al.* In situ observations of reconnection Hall magnetic fields at Mars:  
 496 Evidence for ion diffusion region encounters. *J. Geophys. Res.* **114**, A11204,  
 497 doi:10.1029/2009JA014544 (2009).
- 498 19. Arridge, C. S. *et al.* Plasma electrons in Saturn's magnetotail: Structure, distribution  
 499 and energisation. *Planet. Space Sci.* **57**, 2032-2047, doi:10.1016/j.pss.2009.09.007 (2009).
- 500 20. Chen, L.-J. *et al.* Observation of energetic electrons within magnetic islands. *Nature*  
 501 *Physics* **4**, pp.19-23, doi:10.1038/nphys777, 2008.

## 502 Figures and captions

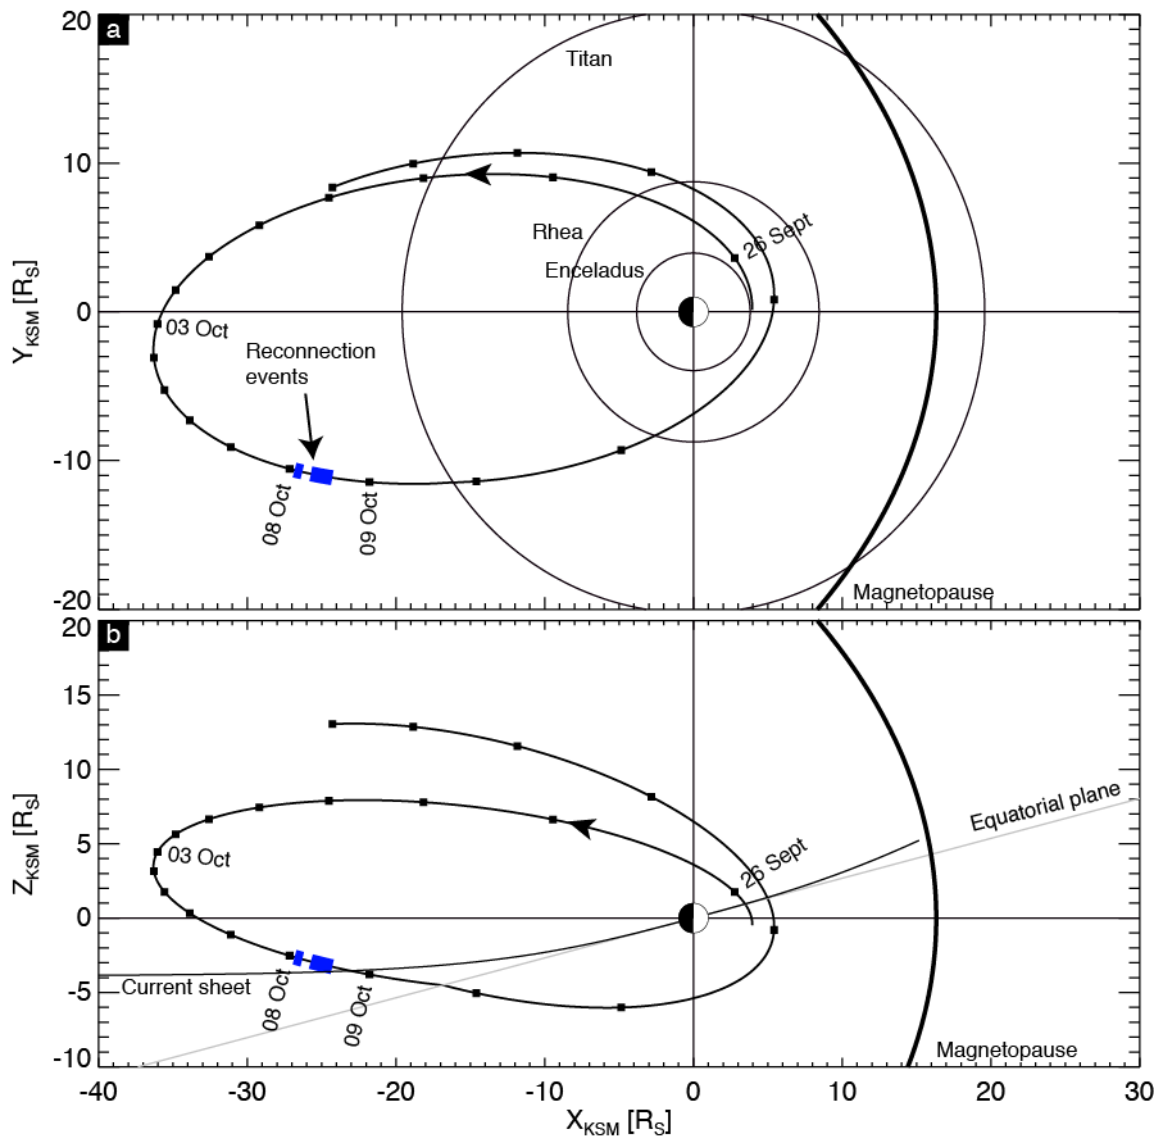

503

504 Figure S1: Trajectory of Cassini in KSM during the event in this paper (highlighted in blue).  
505 Panel (a) shows the trajectory projected into the X-Y plane and (b) the X-Z plane. The  
506 model current sheet location is shown in panel (b) and a model magnetopause in both  
507 panels.



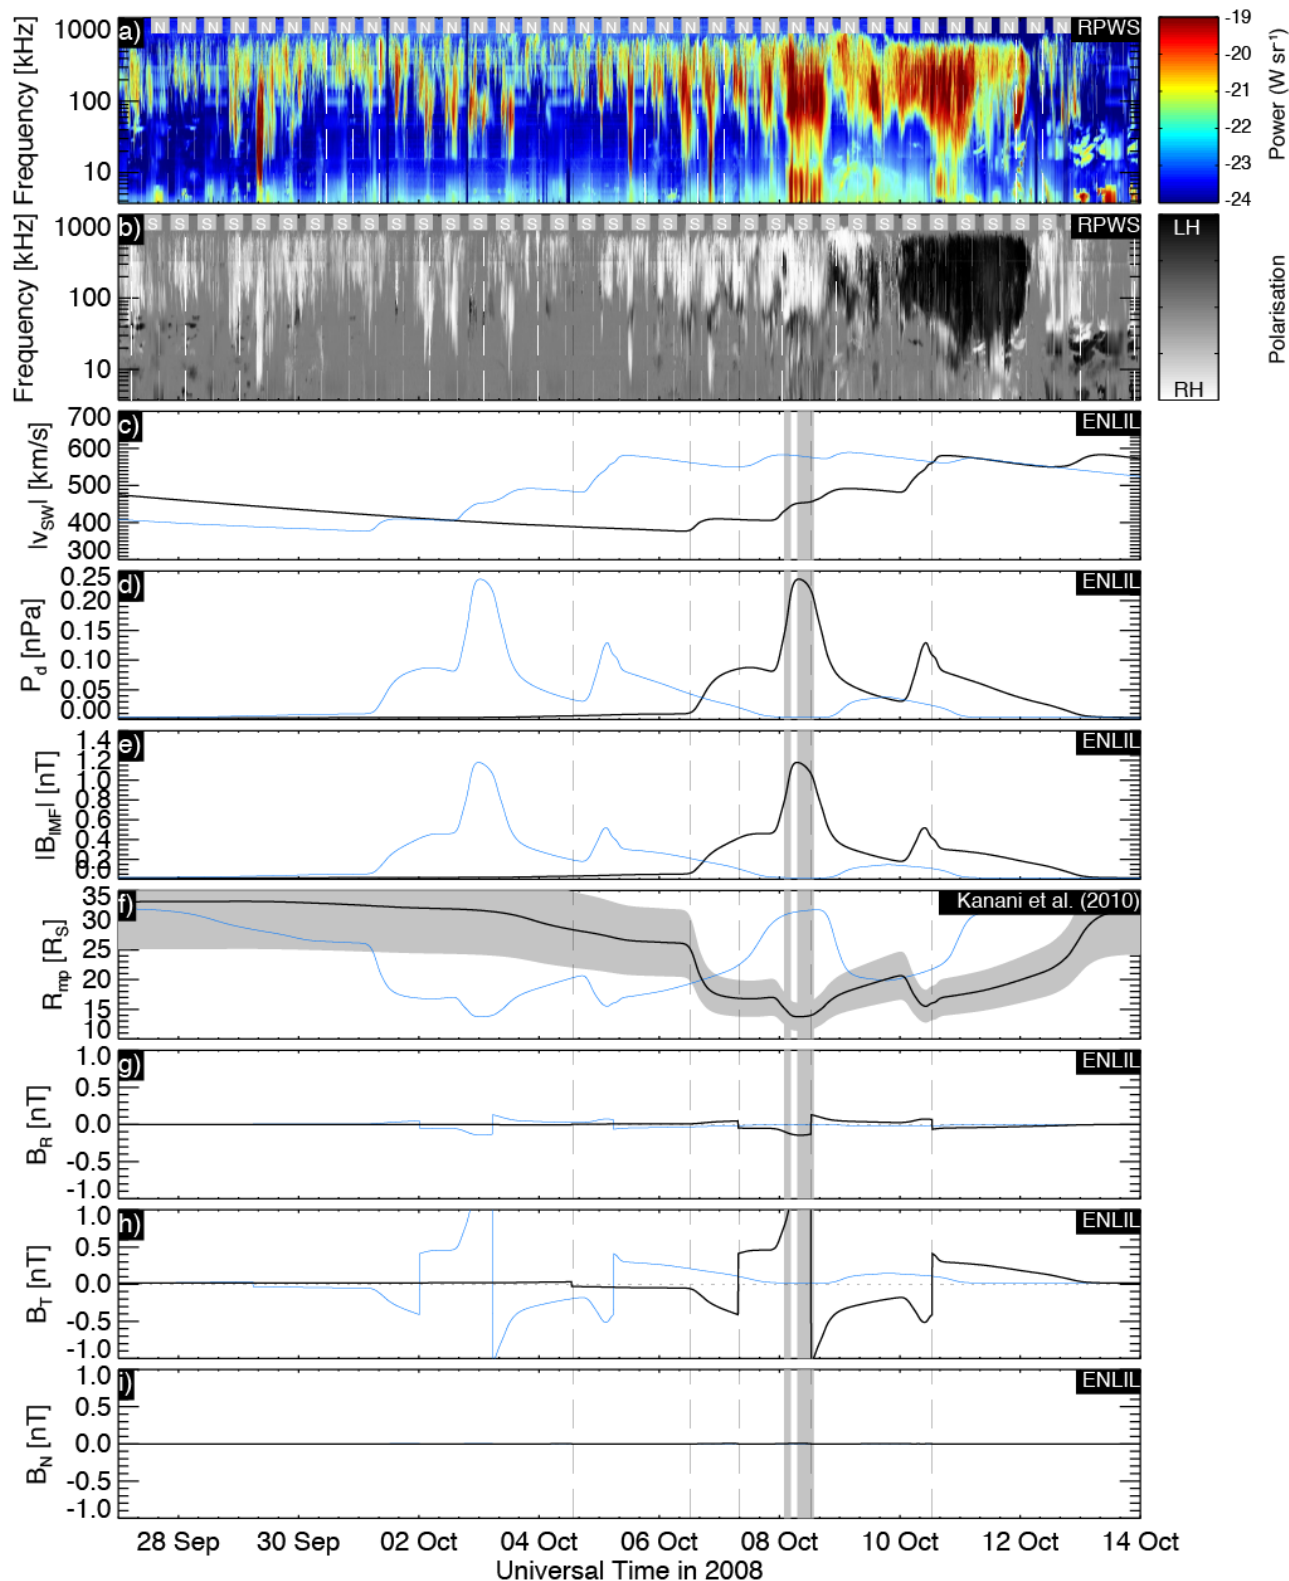

508

509 Figure S2: Cassini radio and plasma wave observations and ENLIL solar wind simulation  
 510 results showing the inferred upstream solar wind conditions during the event: (a) electric  
 511 field flux density measured by the Cassini/RPWS instrument and scaled to 1 AU distance,

512 grey “S” and white vertical lines indicates when SKR emissions from the southern  
 513 hemisphere should be detected based on the SLS4 system; (b) electric field circular  
 514 polarisation measured by the Cassini/RPWS instrument (white indicates emissions from  
 515 the northern hemisphere, black from the south), grey and white vertical lines indicates  
 516 when SKR emissions from the northern hemisphere should be detected based on the  
 517 SLS4 system; (c) solar wind speed from ENLIL; (d) solar wind dynamic pressure from  
 518 ENLIL; (e) interplanetary magnetic field strength from ENLIL; (f) inferred subsolar position  
 519 of the magnetopause based on the ENLIL dynamic pressure and a model magnetopause<sup>9</sup>;  
 520 (g-i) magnetic field in the RTN coordinate system from ENLIL. The vertical dashed black  
 521 lines indicate HCS crossings. The grey vertical bars indicate the reconnection regions in  
 522 Figure 3 of the main manuscript. In each ENLIL panel the blue curves show the original  
 523 ENLIL data, black shows the ENLIL data which has been shifted in time by 5.3 days to  
 524 match the enhancements in the measured SKR flux, as discussed in the Supplementary  
 525 Material text.

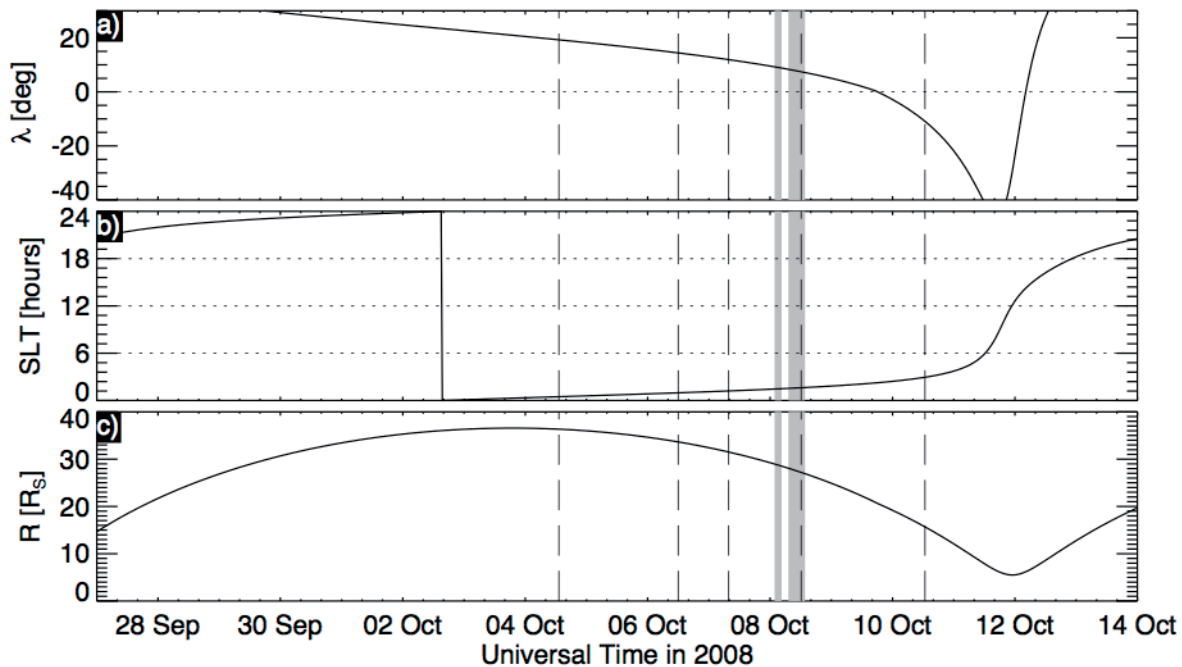

526

527 Figure S3: Cassini orbital parameters used to interpret Cassini radio and plasma wave  
 528 observations: (a) latitude, (b) local time and (c) radial distance of Cassini.

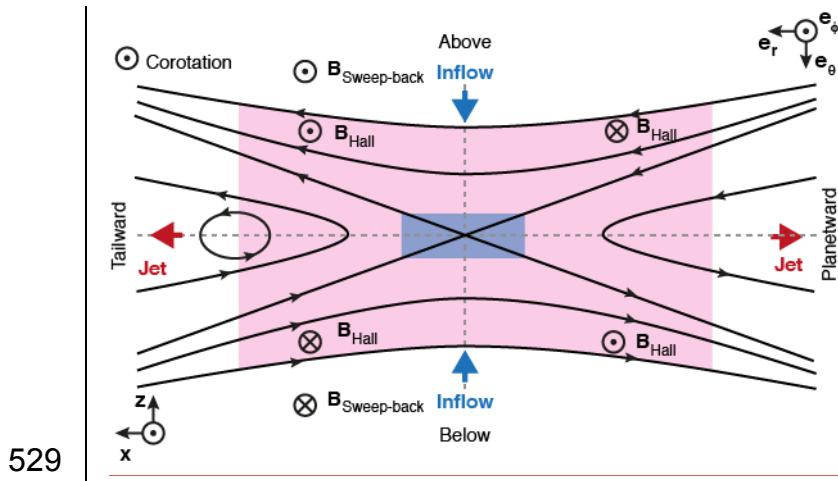

530 Figure S4: Schematic diagram showing the reconnecting current sheet with the ion (pink)  
 531 and electron (blue) diffusion regions<sup>11</sup>, inflow and outflow jets, and the orientation of the  
 532 Hall magnetic field and magnetic field associated with the sweep-back of the magnetic  
 533 field.

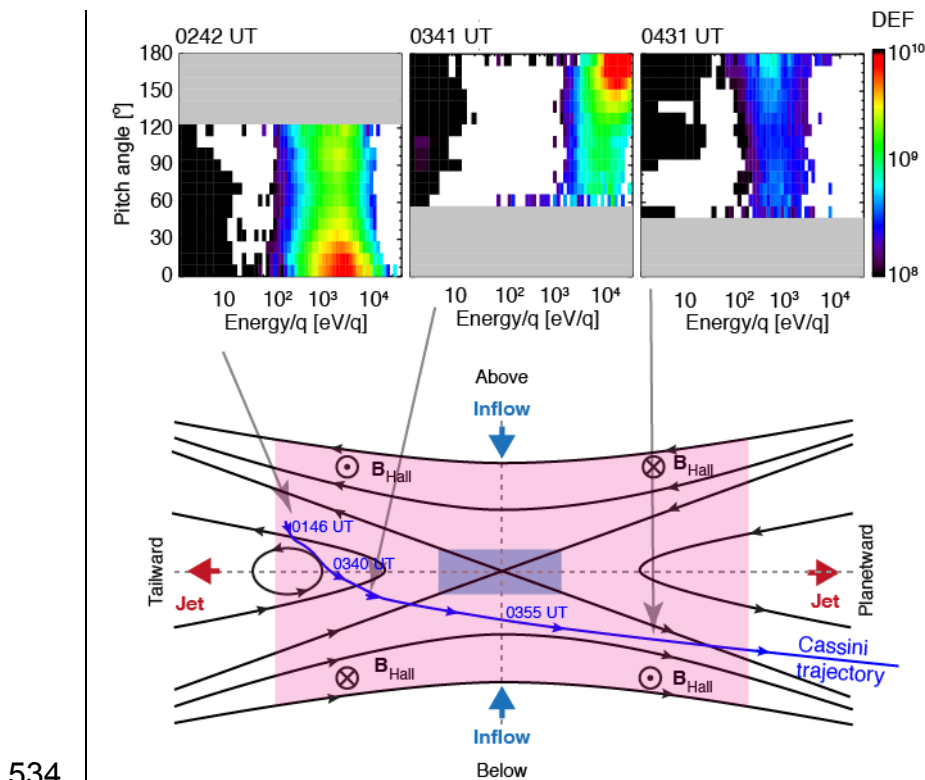

535 Figure S5: Electron pitch angle distributions in three of the four quadrants of the X-line.  
536 Because of changes in orientation of the spacecraft and the magnetic field, combined with  
537 the  $160^\circ \times 5^\circ$  instantaneous field of view of the ELS analyser, the pitch angle coverage is  
538 generally incomplete with pitch angles of only  $0^\circ$  or  $180^\circ$  covered by the instrument field of  
539 view. The colour scale shows the measured differential energy flux in units of  $\text{eV m}^{-2} \text{s}^{-1} \text{sr}^{-1}$   
540  $\text{eV}^{-1}$ .

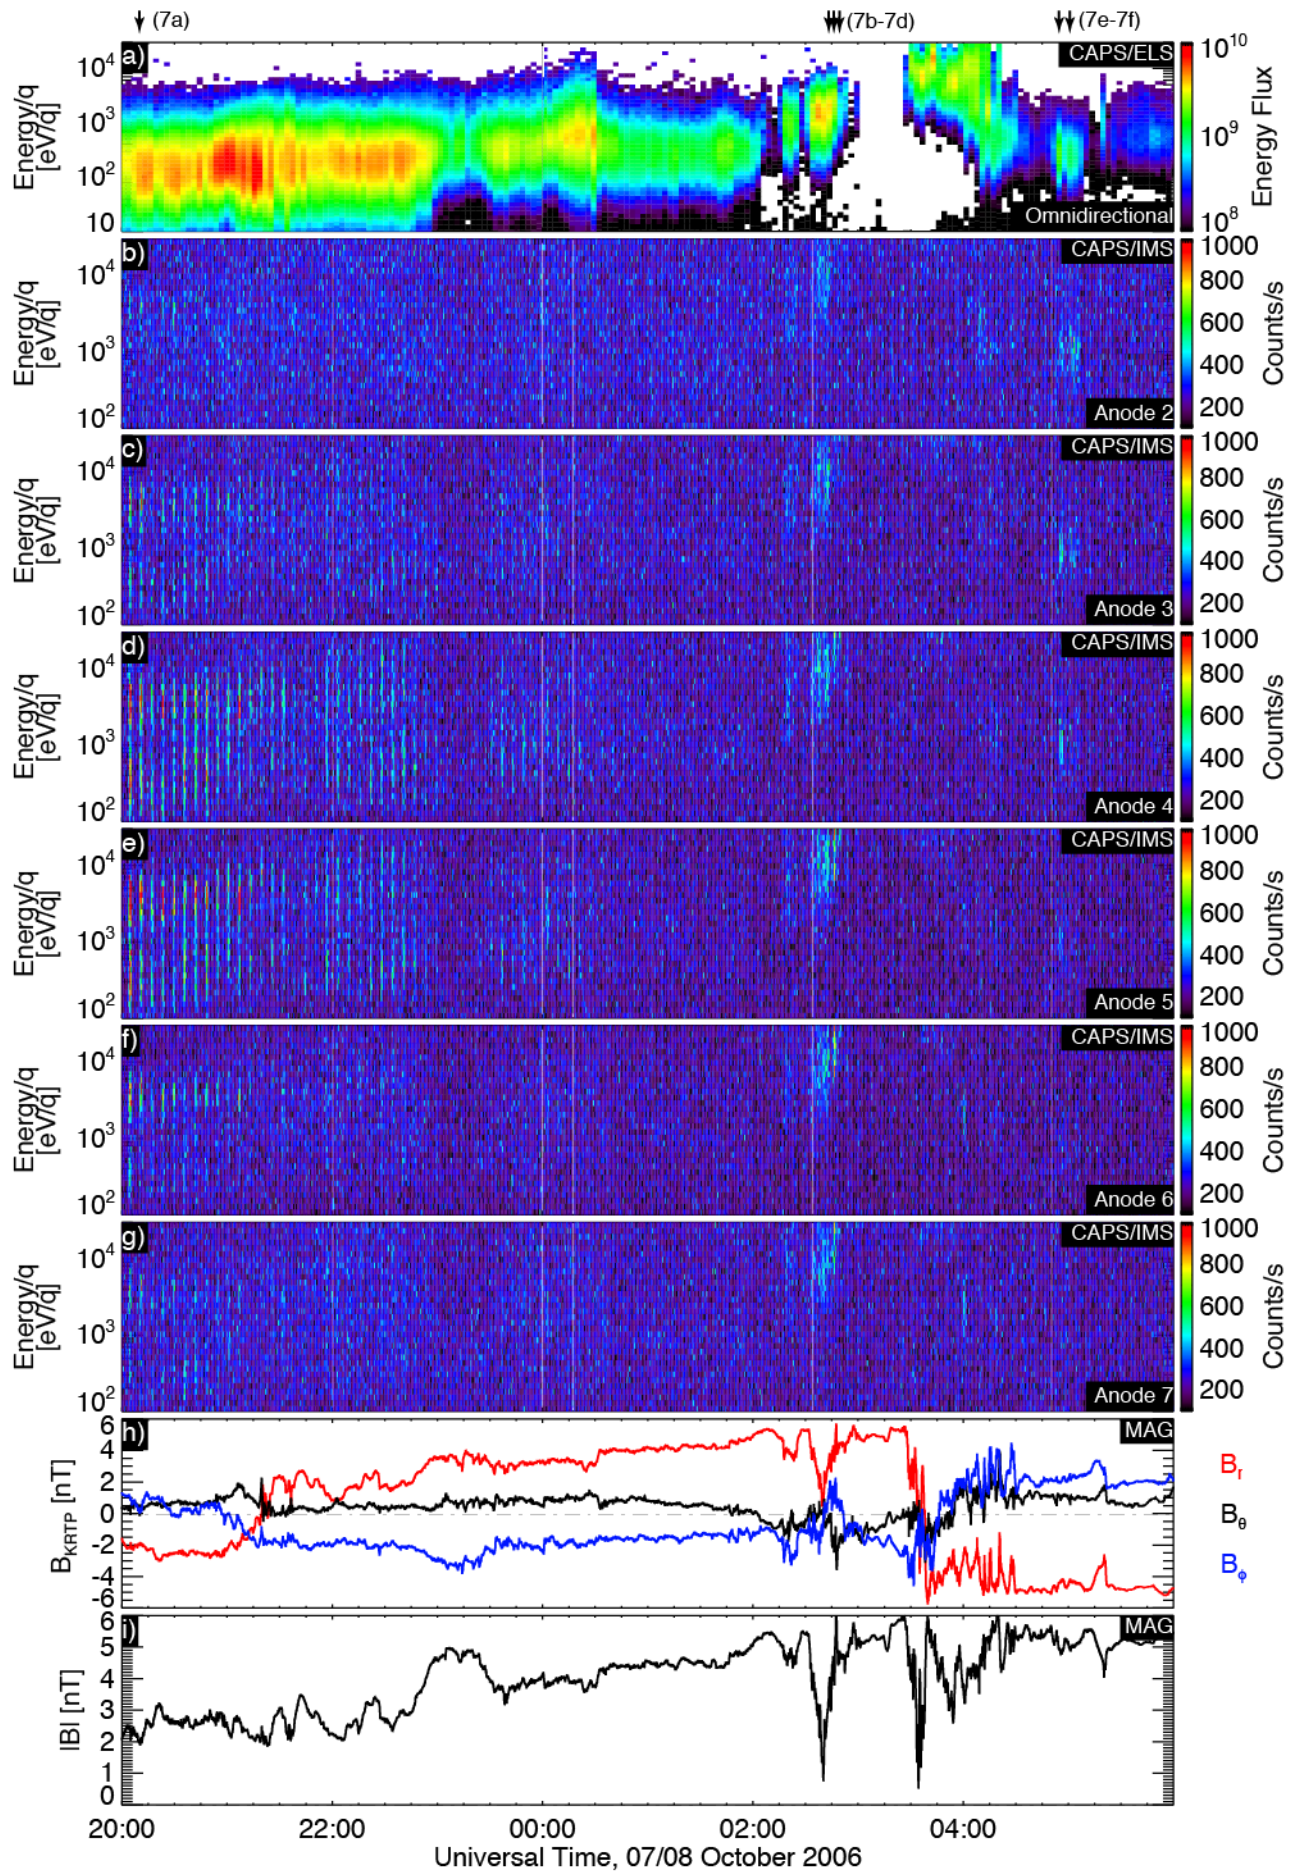

542 Figure S6: Ion fluxes measured by CAPS/IMS with electron fluxes and magnetic field data  
 543 for reference. Panels (b-g) show ion fluxes from anodes 2-7 of CAPS/IMS on a linear  
 544 colour scale from 100 to 1000 counts/32s (summed over a 32s instrument duty cycle).  
 545 There are no measurable fluxes below 100 eV/q. The arrows at the top of each panel  
 546 indicate the times of the OAS plots presented in figure S7.

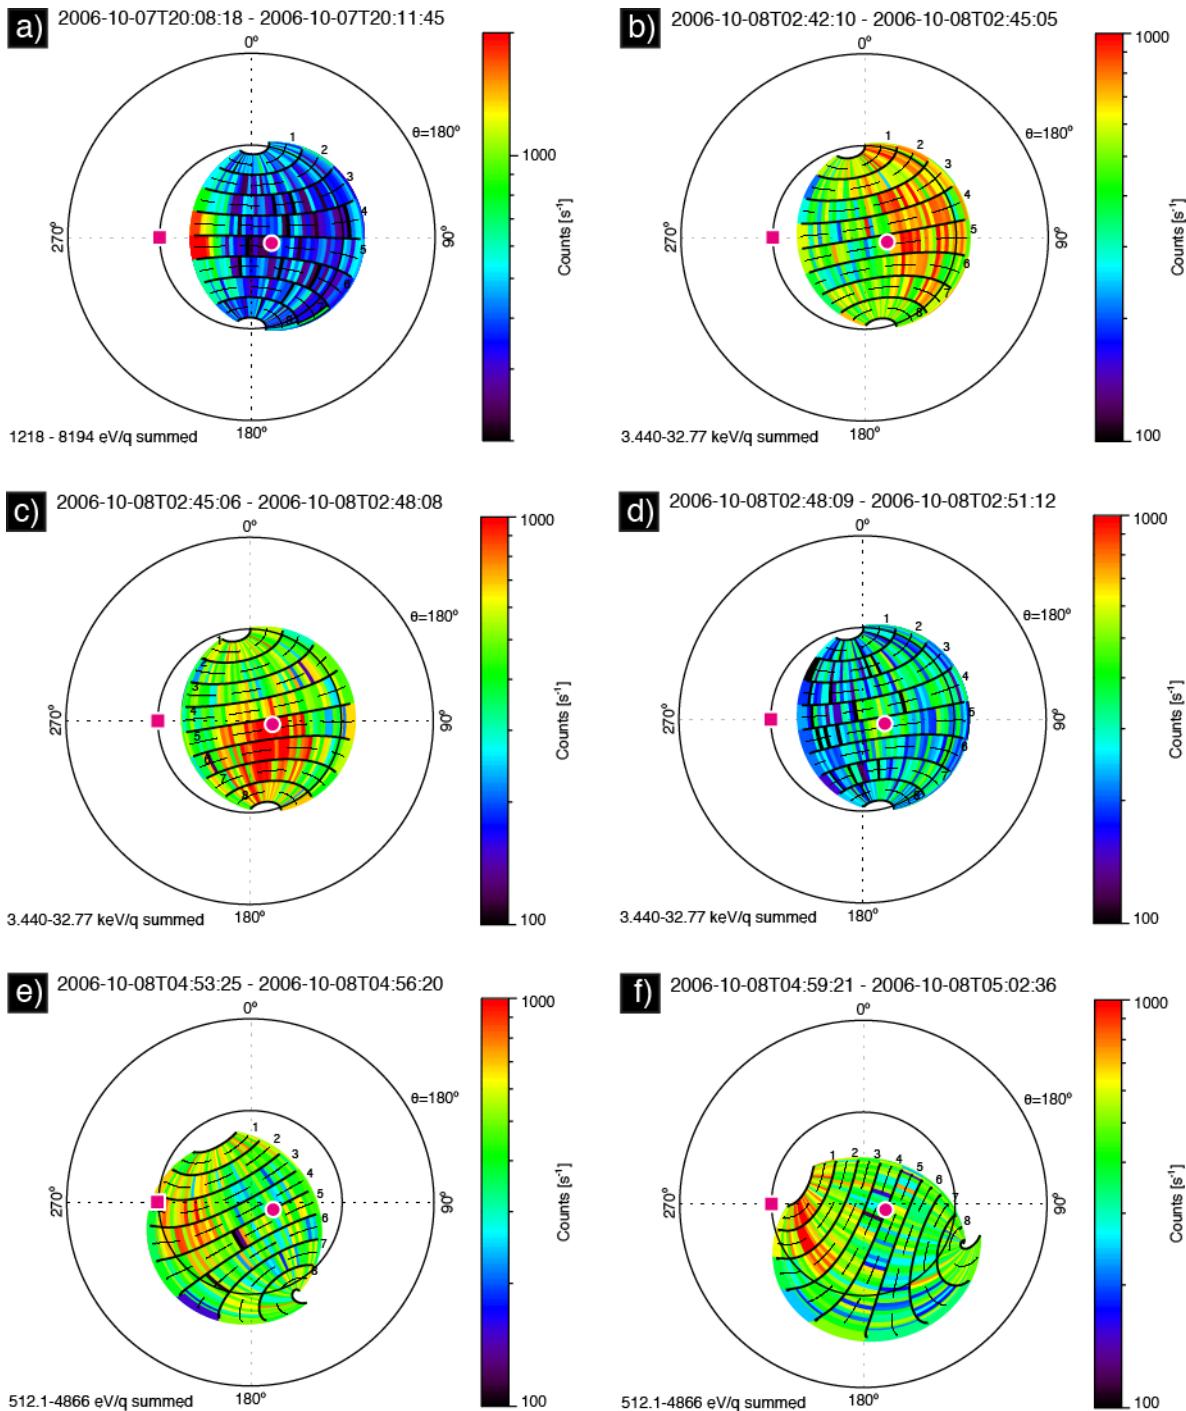

547

548 Figure S7: Ion fluxes presented as a function of look direction in OAS coordinates. Pink  
549 circles show the Sun direction, and pink square shows the corotation direction. Saturn is in  
550 the centre of each panel.

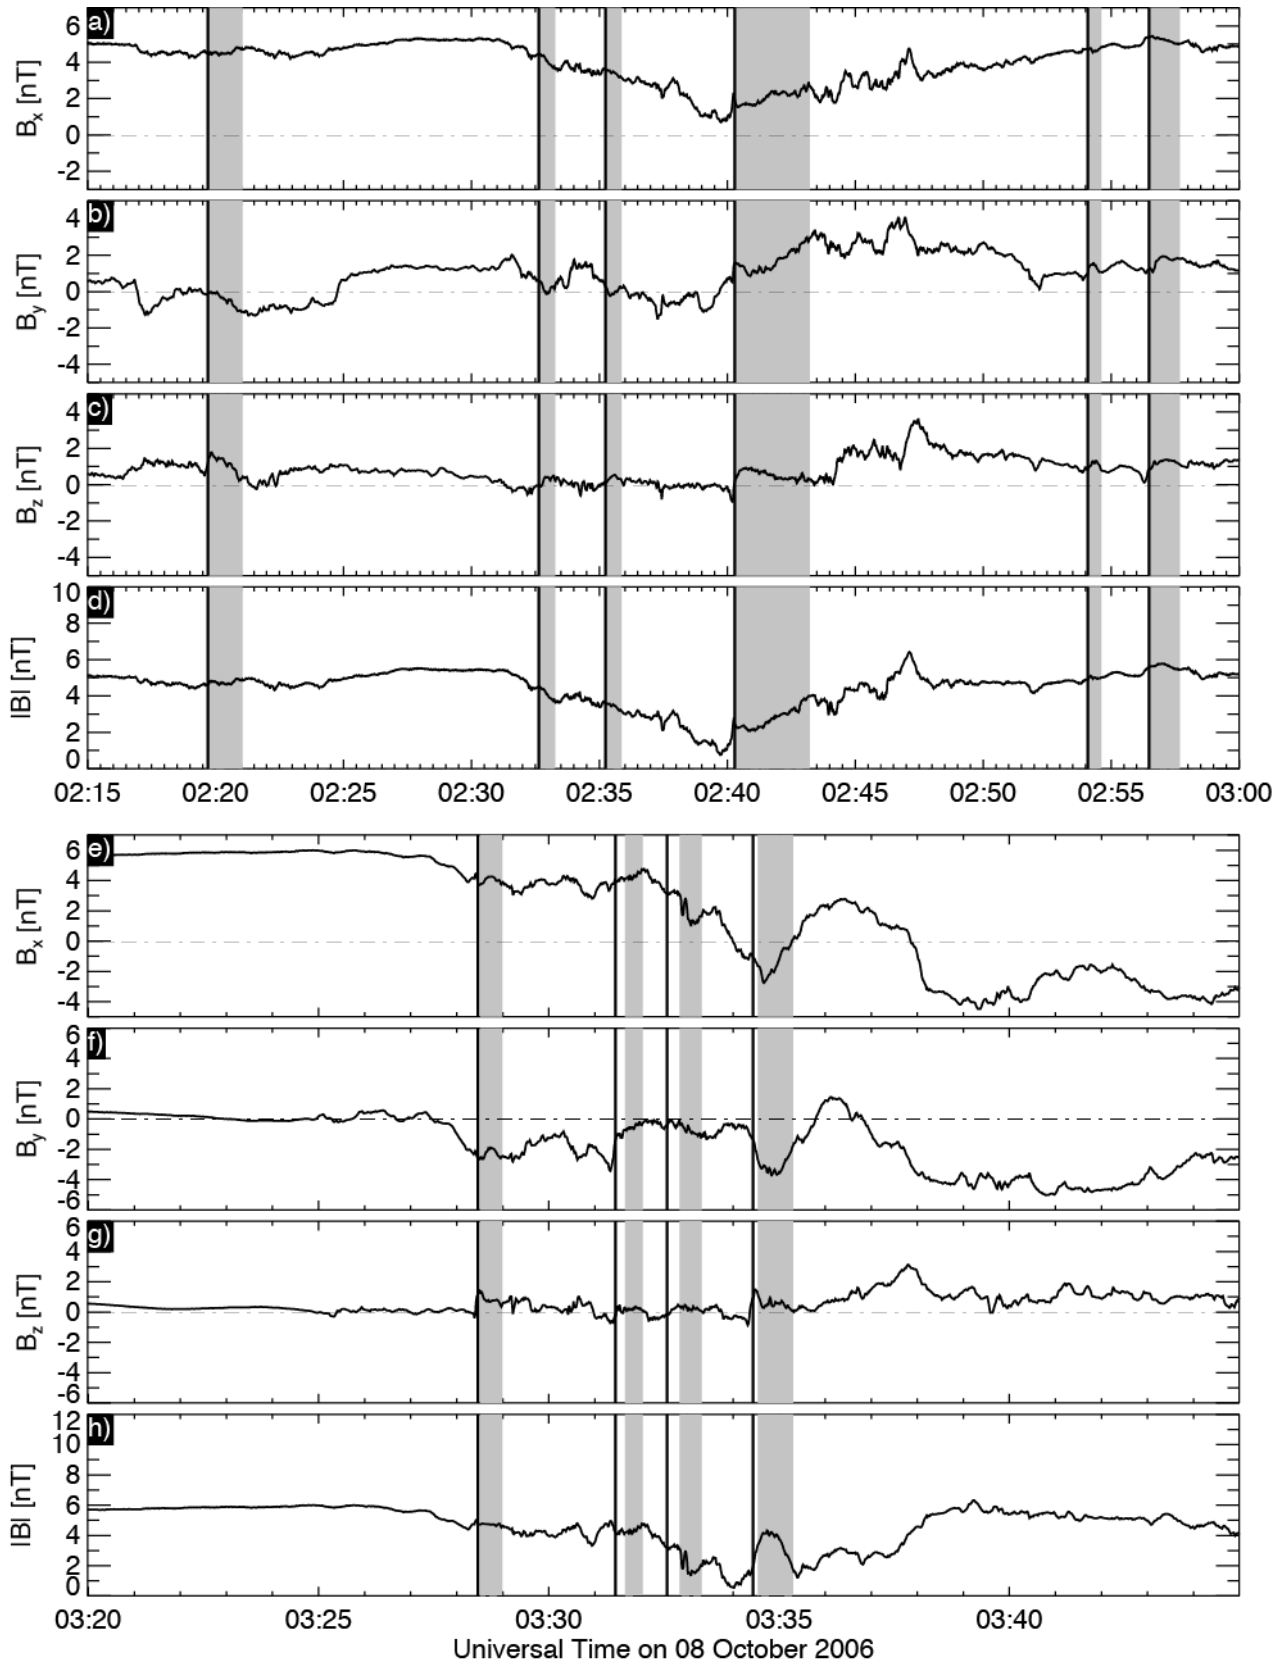

551

552 Figure S8: Small plasmoids observed in magnetometer data on the tailward side of the X-  
 553 line. Panels (a-d) show magnetometer data from 0215 – 0300 UT and panels (e-h) show



554 data from 0320-0345 UT on 08 October. Both sets of data are presented in the X-line  
 555 coordinate system. The bold vertical lines indicate the passage of small plasmoids, the  
 556 shaded grey regions indicate post-plasmoid plasma sheets. Note the different time scales  
 557 and y-axis scales in each plot.

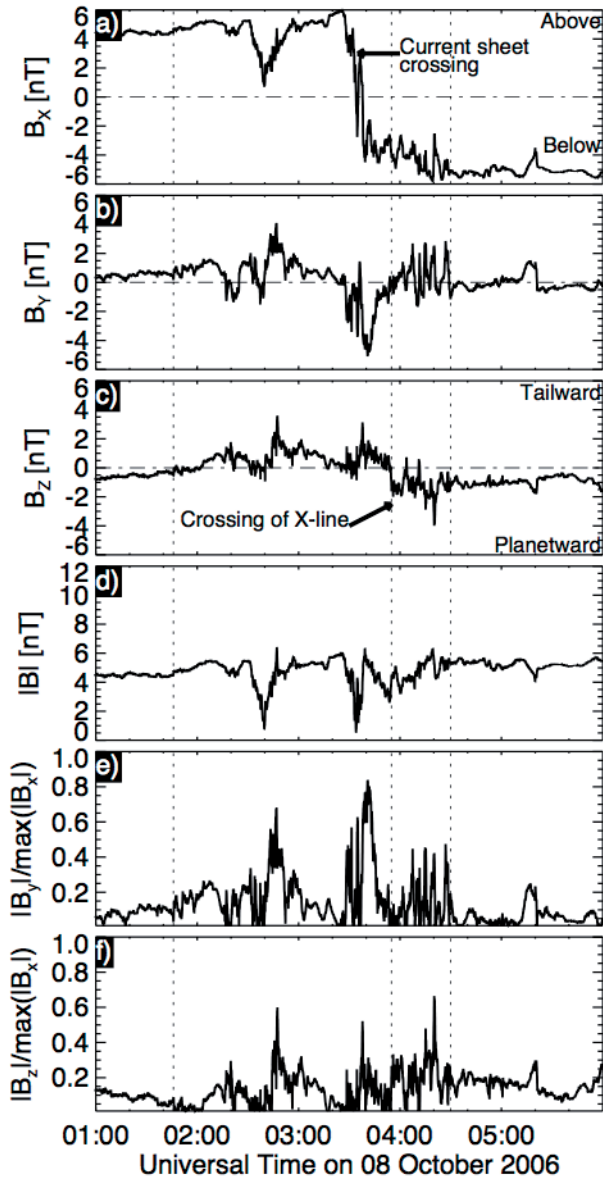

558  
 559 Figure S9: Reconnection rate and Hall magnetic field strength estimates near the diffusion  
 560 region. Panels (a-d) show the measured magnetic field in the X-line coordinate system,  
 561 panel (e) shows the strength of the Hall field expressed as the dimensionless ratio

562  $|B_y|/\max(|B_x|)$  and panel (f) shows a dimensionless proxy for the rate of reconnection given  
 563 by as the dimensionless ratio  $|B_z|/\max(|B_x|)$ .

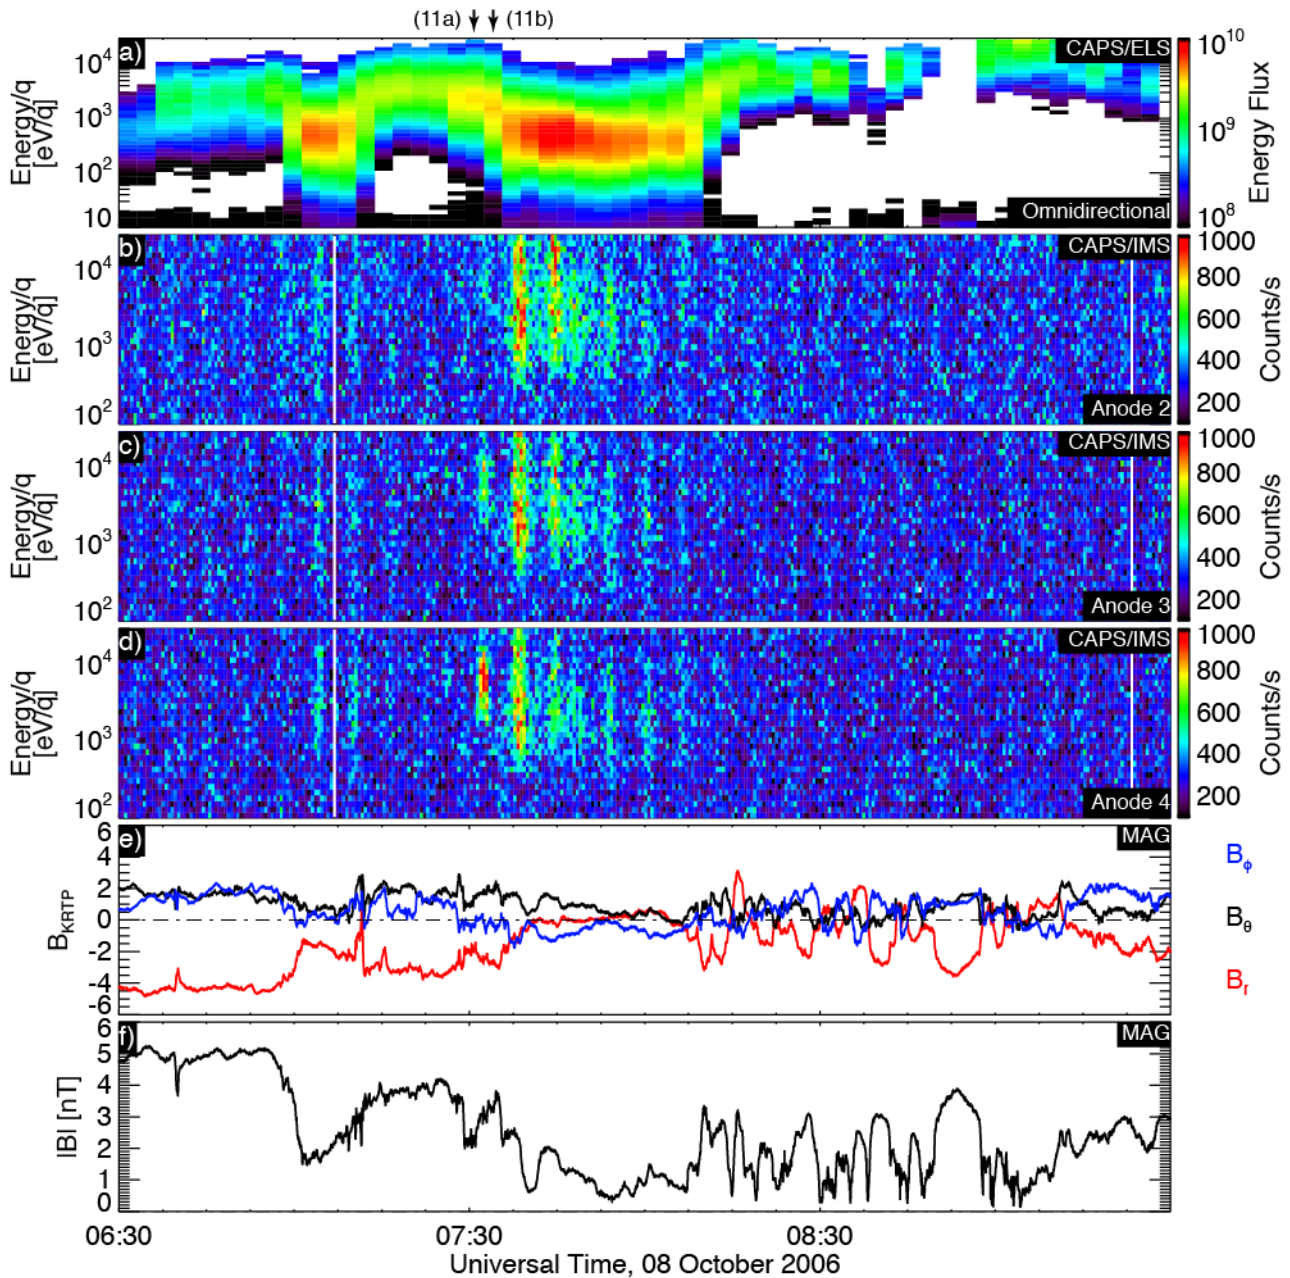

564  
 565 Figure S10: Electron, ion and magnetic field observations during re-encounter or restart of  
 566 reconnection. Panel (a) shows a CAPS/ELS time-energy spectrogram of omni-directional  
 567 flux averaged over a CAPS actuation cycle. Panels (b-d) show time-energy spectrograms  
 568 of ion flux averaged over 32s from anodes 2-4 of CAPS/IMS (the anodes showing the  
 569 highest flux). Panels (e) and (f) show the magnetic field components and field magnitude.

- 570 The arrows at the top of each panel indicate the times of the OAS plots presented in figure  
571 S11.

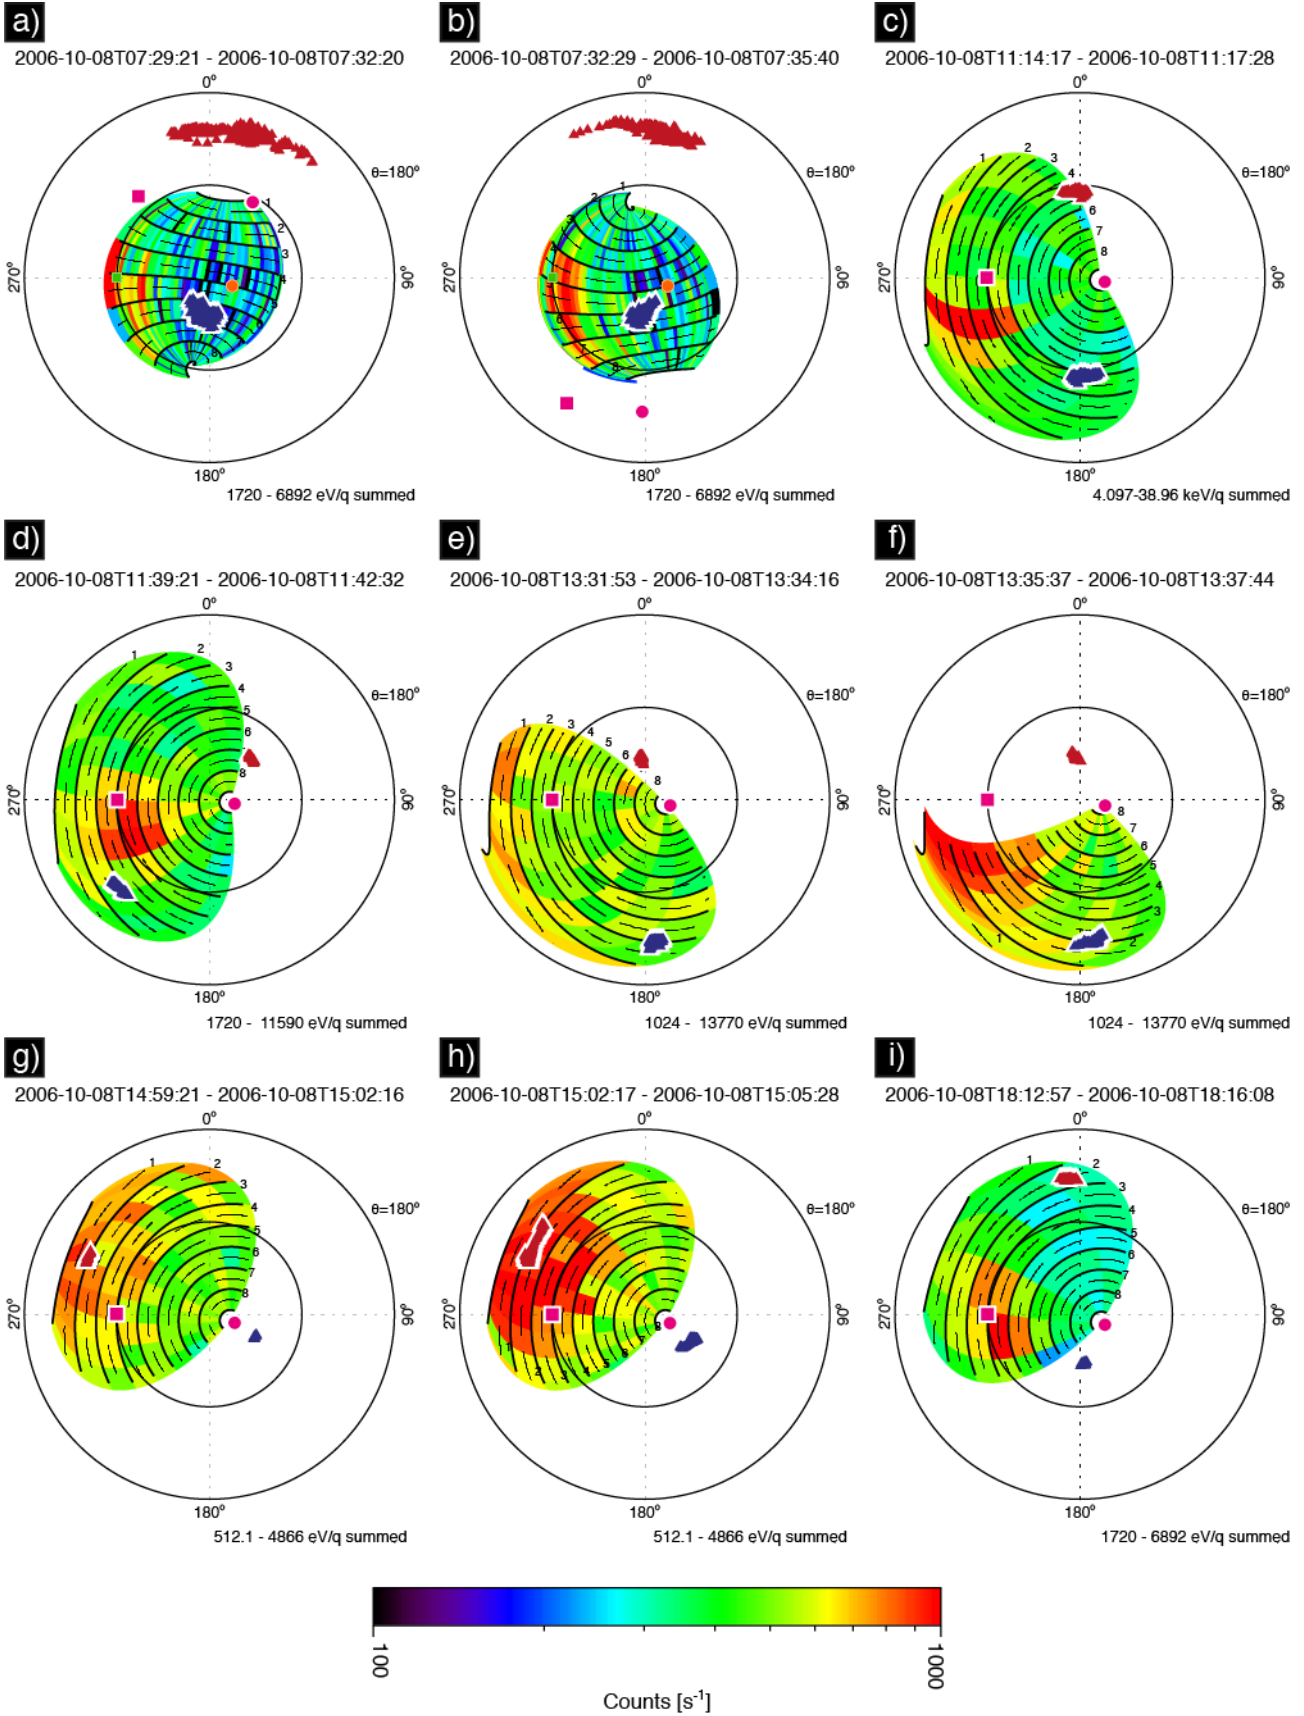

573 Figure S11: Ion fluxes presented as a function of look direction in OAS coordinates  
 574 corresponding to times in figures S10 and S12. Red and blue triangles show  $0^\circ$  and  $180^\circ$   
 575 pitch angle directions respectively. Pink circles and squares show the directions to the Sun  
 576 and corotation direction respectively. Saturn is in the centre of each panel.

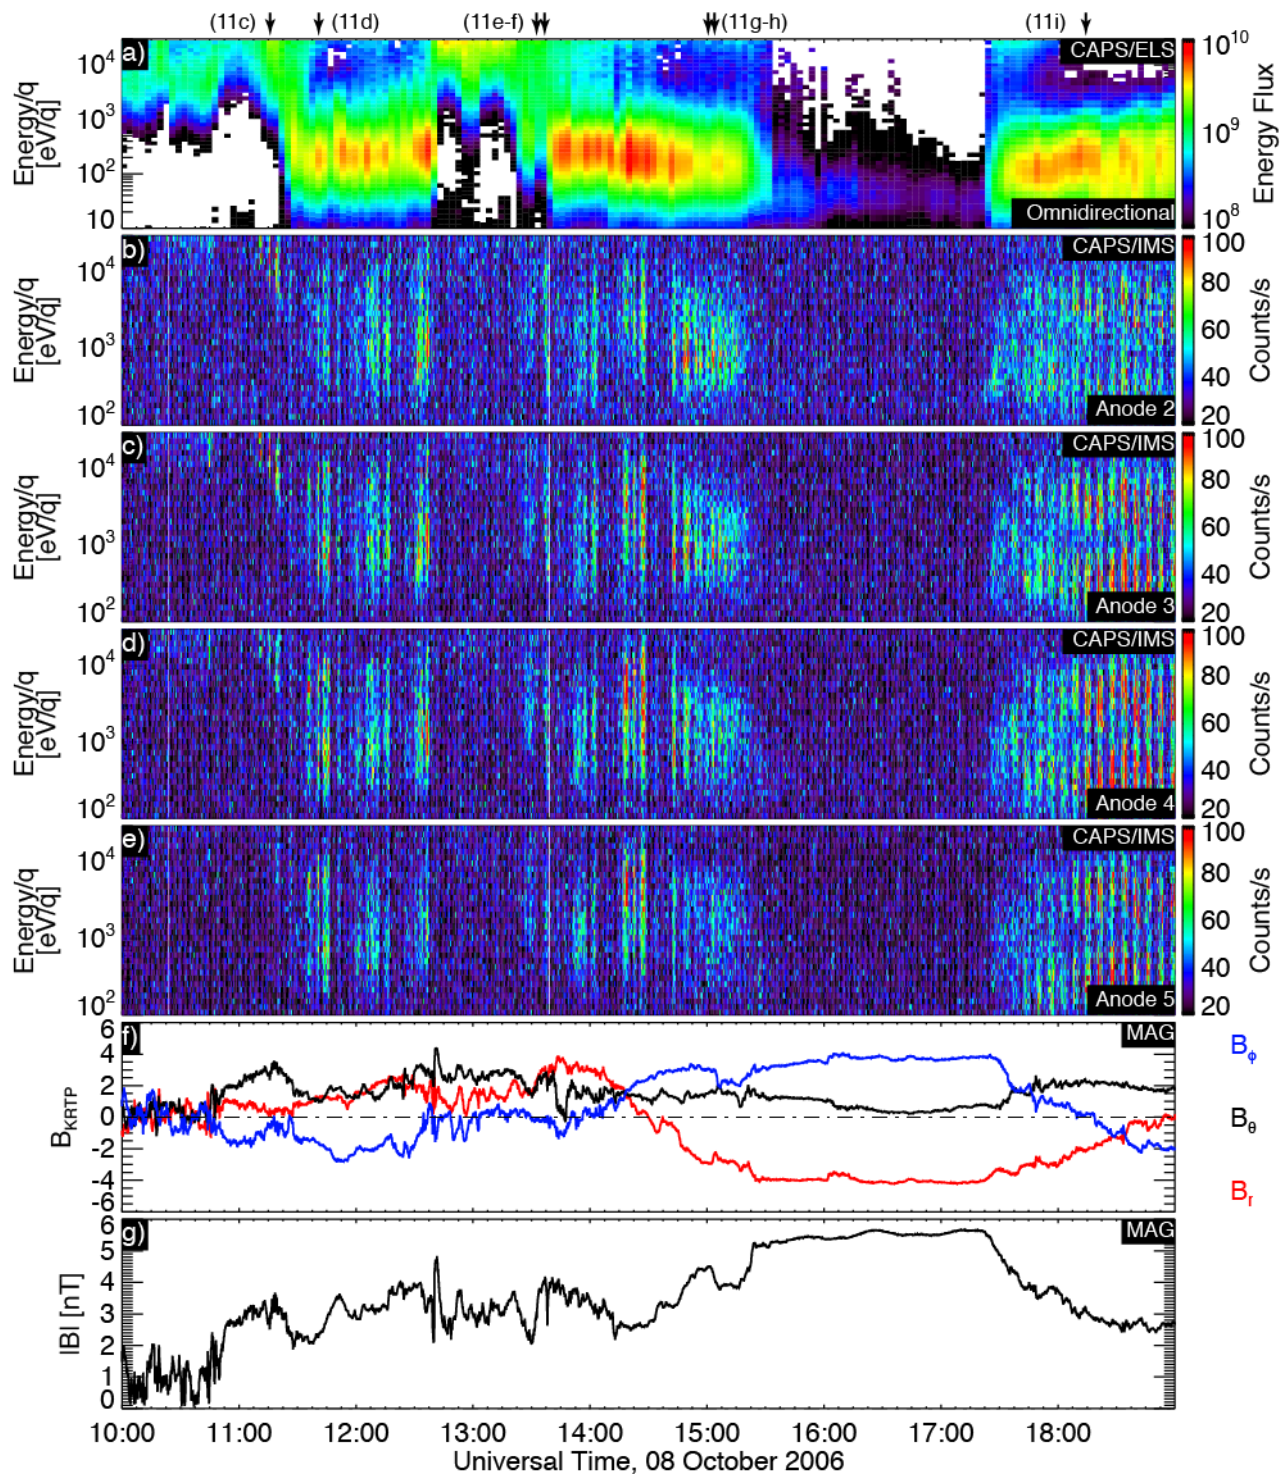

577

578 Figure S12: Electron, ion and magnetic field observations during re-encounter or restart of  
 579 reconnection. Panel (a) shows a CAPS/ELS time-energy spectrogram of omni-directional  
 580 flux averaged over a CAPS actuation cycle. Panels (b-e) show time-energy spectrograms  
 581 of ion flux averaged over 32s from anodes 2-5 of CAPS/IMS (the anodes showing the  
 582 highest flux). Panels (f) and (g) show the magnetic field components and field magnitude.  
 583 The arrows at the top of each panel indicate the times of the OAS plots presented in figure  
 584 S11.

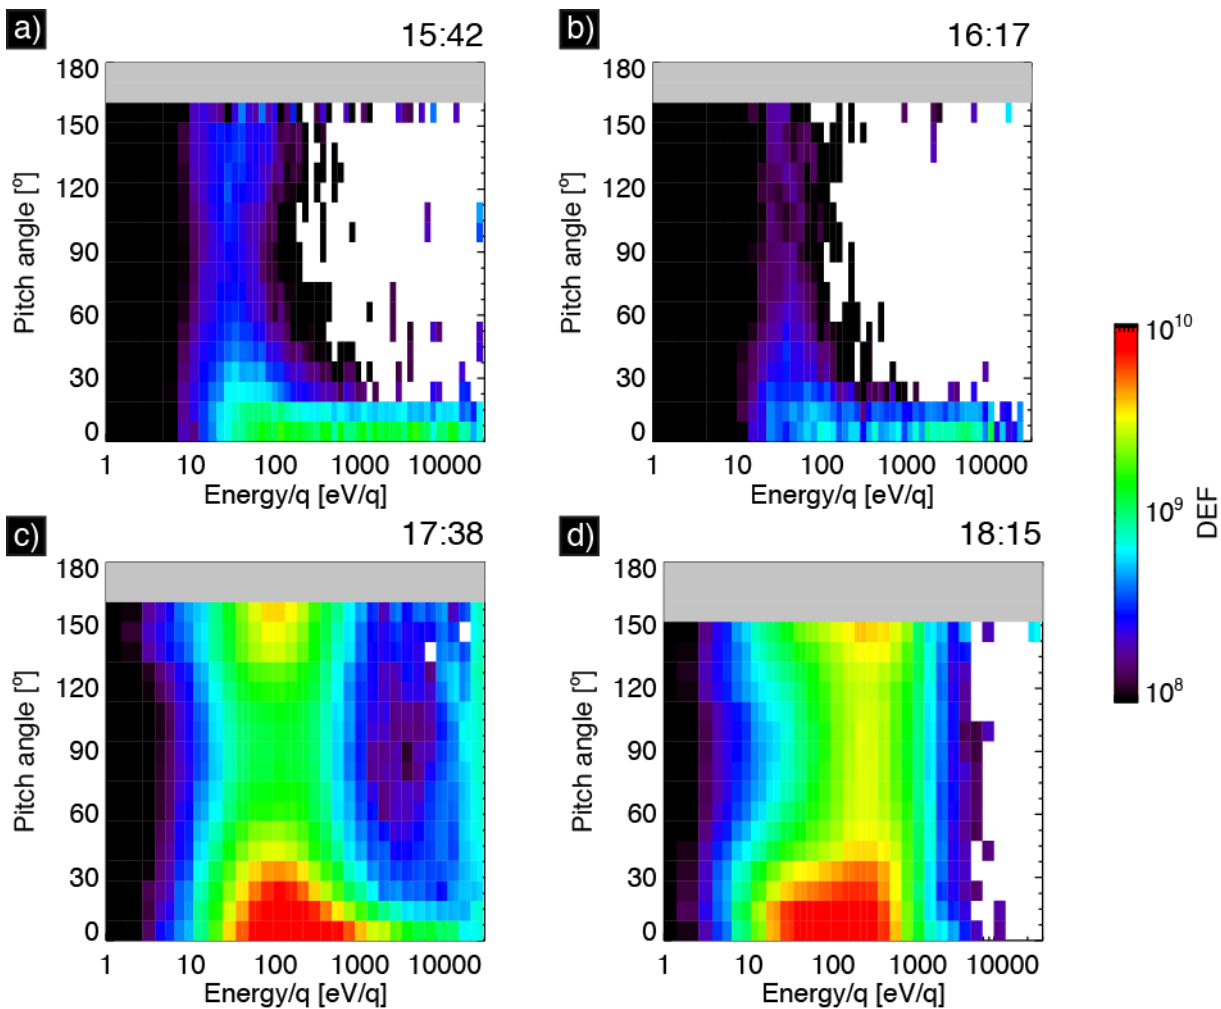

585  
 586 Figure S13: Electron pitch angle distributions near the lobe showing electrons forming a  
 587 beam flowing parallel to the magnetic field ( $0^\circ$  pitch angle) near the lobe/plasma sheet

588 boundary (a and c), in the lobe (b), and returning to a bidirectional  $\sim 100$  eV population in  
589 the plasma sheet.
